# Supplementary material for: Emissions of Organic Compounds from Western US Wildfires and Their Near Fire Transformations
Source: Copernicus journal article supplement (doi:10.5194/acp-2022-297), 2022-04-25
Supplement: Supplementary file 1 [file acp-2022-297-supplement.zip]

Archive with 2 entries (2 files):
- Data Supplement FireX AQ v5.xlsx
- SI FIREXAQ v5.pdf
