# Supplementary material for: Emissions of Organic Compounds from Western US Wildfires and Their Near Fire Transformations
Source: Copernicus journal article supplement (doi:10.5194/acp-2022-297), 2022-04-25
Supplement: Supplementary file 1 [file acp-2022-297-supplement.zip › Data Supplement FireX AQ v5.xlsx]

## Sheet: Particle EF MCE relationship
Compound	Formula	Class	Retention index n-alkane	Slope (a)	Intercept (b)	R2_fit
(1R,4aS,7S)-7-Ethenyl-1,4a,7-trimethyl-9-oxo-2,3,4,5,6,8,10,10a-octahydrophenanthrene-1-carboxylic acid	C23H36O3Si	Terpenoid	2521.91	-11.2819	7.48656	0.635451
(2R,3R,4R,5S)-Hexane-1,2,3,4,5,6-hexaol	C18H46O6Si4	Sugar	1699.62			Only in 1 sample
(3S,4bS,8R,10aS)-4b,8-Dimethyl-2-(propan-2-yl)-4,4a,4b,5,6,7,8,8a,9,10-decahydro-3H-3,10a-epidioxyphenanthrene-8-carboxylic acid	C23H38O4Si	Terpenoid	2678.5	-9.29843	5.81126	0.520403
1,2,4-Benzenetriol	C15H30O3Si3	Aromatic	1595.07	12.636	-14.4422	0.789592
1-(10-Methylanthracen-9-yl)ethanone	C17H14O	PAH	2405.07	-13.5053	10.1459	0.783366
1-4,3-6-Dianhydro-alpha-d-glucopyranose	C9H16O4Si	Sugar	1341.58	-14.3838	11.4164	0.643826
1-Eicosanol	C23H50OSi	Alcohol	2347.48	-5.53309	2.22795	0.515585
1-Heneicosanol	C24H52OSi	Alcohol	2448.03	-2.13875	-1.74874	0.332496
1-Hexacosanol	C29H62OSi	Alcohol	2622.5	-6.38275	2.56513	0.314088
1-Hexadecanol	C19H42OSi	Alcohol	1955.88	-5.01948	0.963978	0.359305
1-Monopalmitin	C25H54O4Si2	Oxygenated	2580.56	-5.72389	2.35846	Two data points
1-Naphthalenecarboxylic acid, decahydro-5-(5-hydroxy-3-methylpentyl)-1,4a-dimethyl-6-methylene-, (1R,4aS,5R,8aS)-	C26H50O3Si2	Oxygenated	2533.94	-8.98945	5.86689	Two data points
1-Octadecanol	C21H46OSi	Alcohol	2152.38	-5.85876	1.90041	0.599082
1-Tetracosene	C24H48	Alkene	2393.05	-5.882	2.43844	0.359877
10,18-Bisnorabieta-5,7,9(10),11,13-pentaene	C18H22	PAH	2105.95	-16.2221	12.9633	0.535997
10,18-Bisnorabieta-8,11,13-triene	C18H26	Terpenoid	2087.08	-13.3494	9.51703	0.813966
11-Eicosenoic acid, (Z)-	C23H46O2Si	Acid	2430.85	-5.41811	1.9998	0.726375
16-Hydroxyhexadecanoic acid	C22H48O3Si2	Oxygenated	2384.45	-8.33993	5.26499	0.507448
2, 4-Dihydroxyacetophenone	C14H24O3Si2	Aromatic	1688.81	-13.197	9.34184	0.615362
20-hydroxyeicosanoic acid	C26H56O3Si2	Oxygenated	2774.44	-7.05282	3.83464	0.821445
3,4-Dihydroxybenzaldehyde	C13H22O3Si2	Aromatic	1610.7	-6.40931	3.04225	0.732863
3,4-Dihydroxybenzoic acid	C16H30O4Si3	Aromatic	1813.3	-10.0183	6.36556	0.625543
3-(Methylthio)benzoic acid	C11H16O2SiS	Sulfur-containing	1640.74	-14.7363	10.4064	0.734386
3-Hydroxy-4-methyl-6H-benzo[c]chromen-6-one	C17H18O3Si	Aromatic	2230.69	-7.12417	3.66307	0.76678
3-Hydroxybenzoic acid	C13H22O3Si2	Aromatic	1560.53	7.65033	-9.87562	0.991201
3-Vanilpropanol	C16H30O3Si2	Aromatic	1811.96	-12.9627	9.79944	0.663635
3-methyl-5-nitrocatechol	C13H23O4Si2N	Nitrogen	1829.29	2.78797	-5.4736	0.0222347
4,4-(Tetrahydrofuran-3,4-diyldimethanediyl)bis(2-methoxyphenol)	C26H40O5Si2	Aromatic	2978.67	-7.09832	3.84142	0.267085
4-Coumaric acid	C15H24O3Si2	Aromatic	1934.55	-7.36622	3.17291	0.451944
4-Hydroxybenzoic acid	C13H22O3Si2	Aromatic	1623.91	-8.55575	4.91047	0.542159
4-methyl-5-nitrocatechol	C13H23O4Si2N	Nitrogen	1773.32	15.0091	-17.15	0.432188
4-nitrocatechol	C12H21O4Si2N	Nitrogen	1739.28	11.301	-13.0817	0.444856
4b,8-Dimethyl-2-isopropylphenanthrene, 4b,5,6,7,8,8a,9,10-octahydro-	C19H28	Terpenoid	1988.42	-9.01522	5.64709	0.152072
5-(hydroxymethyl)furfural	C9H14O3Si	Aromatic	1307.61	-12.1576	9.37078	0.503283
6,4'-Dimethoxy-7-hydroxyisoflavone	C20H22O5Si	Terpenoid	2746.87	-9.22826	5.90249	0.406644
7-Isopropyl-1,1,4a-trimethyl-1,2,3,4,4a,9,10,10a-octahydrophenanthrene	C20H30	Terpenoid	2066.77	-13.7896	9.79643	0.548146
7-Oxodehydroabietic acid methyl ester	C21H28O3	Aromatic	2584.26	-14.2233	10.9698	0.785931
7-Oxodehydroabietic acid	C23H34O3Si	Terpenoid	2597.19	-17.1008	13.7118	0.811523
8-Isopropyl-1,3-dimethylphenanthrene	C19H20	PAH	2322.21	-15.4659	12.4878	0.723466
9-Ethyl-10-methylanthracene	C17H16	PAH	2079.83	-14.2657	10.1998	0.589465
9-Hydroxynonanoic acid	C15H34O3Si2	Oxygenated	1710.44	-8.77274	4.68801	0.708795
9-Methylanthracene	C15H12	PAH	1937.22	-14.784	10.5607	0.891975
9-Tetradecenoic acid	C17H34O2Si	Acid	1838.61	-8.73748	5.22214	0.201954
Acenaphthene	C12H10	PAH	1492.28	12.6941	-13.5379	Two data points
Acetovanillone	C12H18O3Si	Aromatic	1614.3	-8.31907	5.10887	0.308801
Adonitol	C20H52O5Si5	Sugar	1697.22			Only in 1 sample
Benzene, 1,3-dimethoxy-5-[(1E)-2-phenylethenyl]-	C16H16O2	Aromatic	1954.72			Only in 1 sample
Butanedioic acid	C10H22O4Si2	Oxygenated	1308.61	17.1666	-17.6252	Two data points
C16 acid isomer 1	C19H40O2Si	Acid	2005.83	-5.37191	1.91574	0.365949
Campesterol	C31H56OSi	Triterpenoid	3257.56	-2.34201	-0.133467	0.783863
Coniferyl alcohol	C16H28O3Si2	Aromatic	1933.22	-5.37322	1.72791	0.337112
Coniferyl aldehyde	C13H18O3Si	Aromatic	1839.95	-12.5098	9.08183	0.732818
Dehydroabietal	C20H28O	Terpenoid	2279.56	-17.6071	14.2252	0.704463
Dehydroabietic acid	C23H36O2Si	Terpenoid	2387.89	-9.57958	8.28434	0.776804
Dehydroabietinol	C23H38OSi	Terpenoid	2306.41	-10.0974	7.06763	0.617381
Deoxy-ribo-hexonic acid 1-4-lactone	C15H34O5Si3	Oxygenated	1765.72	-7.95361	4.55379	0.686319
Docosanoic acid, methyl ester	C23H46O2	Ester	2525.35	-4.41662	1.63298	0.30301
Docosanoic acid	C25H52O2Si	Acid	2636	-4.98616	3.598	0.24299
Docosanol	C25H54OSi	Alcohol	2544.25	-5.26805	2.11931	0.266466
Dodecanoic acid	C15H32O2Si	Acid	1649.15	-7.34014	3.67295	0.404054
Eicosanoic acid, methyl ester	C21H42O2	Ester	2325.37	-8.71203	4.99847	0.706565
Eicosanoic acid	C23H48O2Si	Acid	2436	-8.72171	7.08621	0.55108
Epiambrettolic acid	C22H46O3Si2	Oxygenated	2363.84	-13.0557	9.43859	0.868111
Ferulic acid	C16H26O4Si2	Aromatic	2087.08	-15.4991	11.2041	0.814759
Fluoranthene	C16H10	PAH	2078.38			Only in 1 sample
Heneicosanoic acid	C24H50O2Si	Acid	2533.94	-5.33661	2.80343	0.345033
Heneicosene	C21H42	Alkene	2094.34	-4.6763	0.575983	0.45656
Hentriacontane	C31H64	Alkane	3100.03	-1.85537	-1.43311	0.0375394
Heptacosane	C27H56	Alkane	2700	-3.6144	0.016632	0.295032
Heptadecanoic acid isomer	C20H42O2Si	Acid	2113.2	-15.8268	12.7216	0.752245
Heptadecanoic acid	C20H42O2Si	Acid	2139.32	-8.18885	5.09155	0.669344
Hexacosane	C26H54	Alkane	2600	-7.92452	4.04435	Two data points
Hexacosanoic acid	C29H60O2Si	Acid	3029.77	-3.21868	0.735619	0.0930584
Hexadecanoic acid, methyl ester	C17H34O2	Ester	1922.56	-6.83743	3.4193	0.294296
Hexadecanoic acid	C19H40O2Si	Acid	2042.1	-7.56896	5.82925	0.589436
Hexonic acid, 3-deoxy-, gamma-lactone, 2,5,6-tris-OH	C15H34O5Si3	Oxygenated	1783.98	-4.38145	0.852314	0.35218
Homovanillic Acid	C13H23O4SiN	Aromatic	1762.11	-11.3922	7.73213	0.69525
Isophthalic acid		Aromatic	1753.7	-14.1963	9.97438	0.579234
Isopimaric acid, methyl ester	C21H32O2	Terpenoid	1530.36	-15.2799	11.2364	0.701609
Isopimaric acid	C23H38O2Si	Terpenoid	2341.17	-15.6917	13.3633	0.859159
Juvabione	C16H26O3	Sesquiterpenoid	2017.44	-8.10431	4.88028	0.515891
Kaur-16-en-18-ol, (4-alpha)-	C23H40OSi	Terpenoid	2227.43	-21.3834	17.7909	0.752609
Levoglucosan	C15H34O5Si3	Sugar	1698.42	-13.7563	12.3196	0.758802
Levopimaric acid	C23H38O2Si	Terpenoid	2229.01	-8.31794	5.34119	0.581052
Manool	C20H34O	Terpenoid	2065.32	7.3363	-8.47365	0.999867
Matairesinol, (3R-E)-,	C26H38O6Si2	Aromatic	3156.24	-9.51226	5.36356	0.751646
Methyl 3,4-dihydroxybenzoate	C14H24O4Si2	Aromatic	1714.04	-9.24842	5.29636	0.450743
Methyl dehydroabietate	C21H30O2	Terpenoid	2344.33	-11.5593	9.47307	0.674931
Methyl vanillate	C12H18O4Si	Aromatic	1645.55	-17.6283	14.0709	0.662522
Naphthalene, 1,2,3,4-tetrahydro-6-(1-phenylethyl)-	C18H20	Aromatic	2107	10.6462	-11.6488	Two data points
Nonacosane	C29H60	Alkane	2900	-3.98595	0.417996	0.304496
Nonadecanoic acid	C22H46O2Si	Acid	2336.43	-9.675	6.84014	0.79985
Octacosanoic acid	C31H64O2Si	Acid	3230.54	1.96847	-4.04597	0.10585
Octadecanoic acid	C21H44O2Si	Acid	2240.07	-8.58851	5.86041	0.62181
Octadecenoic acid	C21H42O2Si	Acid	2219.53	-18.9534	15.2862	0.585402
Palustric Acid	C23H38O2Si	Terpenoid	2257.44	-15.4337	12.7995	0.824604
Pentacosane	C25H52	Alkane	2499.58	-1.99818	-1.82794	0.0628364
Pentacosanoic acid	C28H58O2Si	Acid	2930.75	-2.85846	0.0659749	0.121353
Pentadecanoic acid isomer 1	C18H38O2Si	Acid	1907.9	-7.17321	3.65204	0.413982
Pentadecanoic acid isomer 2	C18H38O2Si	Acid	1915.9	-10.4809	6.84207	0.752881
Pentadecanoic acid	C18H38O2Si	Acid	1942.55	-7.67913	4.54646	0.663658
Phenanthrene, 1,7-dimethyl-	C16H14	PAH	2058.06	-13.2703	9.69451	0.504527
Phenanthrene, 2,3,5-trimethyl-	C17H16	PAH	2161.08	-14.8728	11.841	0.712156
Pyroglutamic acid	C11H23O3Si2N	Nitrogen	1515.44			Only in 1 sample
Q2-287		Sugar	1680.4	-14.7298	10.8822	0.562589
Q2-3009		Aromatic	2265.34	-14.4923	11.3723	0.841424
Q2-478		Sugar	1741.68	-7.39349	3.83368	0.383285
Q2-479		Sugar	1644.34	-17.5923	13.7157	0.72422
Q2-47		Sugar	1591.47	-18.3419	14.6482	0.684373
Q2-494		Sugar	1649.15	-15.8596	11.5444	0.717824
Q2-499	C20H30O	Terpenoid	2210.05	-17.5331	14.1709	0.626432
Q2-517	C17H26O2Si	Aromatic	1527.16	-10.6489	7.8974	0.584457
Q2-537		Sugar	1652.76	-14.7402	10.6309	0.796103
Q2-546		Sugar	1650.35	-14.8986	10.7559	0.772341
Q2-551		Sugar	1514.25	-11.5407	8.54304	0.561637
Q2-558		Sugar	1543.31	-11.7131	8.95148	0.428605
Q2-560		Sugar	1653.96	-8.68952	4.99609	0.625422
Q2-572	C16H30O2	Acid	1939.88	-12.6216	9.16943	0.637086
Q2-593		Sugar	1670.78	-14.225	10.3978	0.825904
Q2-601		Terpenoid	3149.49	-13.7424	9.46443	0.783121
Q2-608		Unknown	2552.84	-11.0515	8.21942	0.711024
Q2-613	C22H34O3Si	Terpenoid	2285.88	-15.7186	11.5486	Two data points
Q2-618		Sugar	1598.68	17.2255	-18.8172	0.677504
Q24-198	C14H25O4SiN	Nitrogen	1812.55	14.7778	-17.1824	0.318439
Q33-456	C18H22O3	Terpenoid	2210.45	-12.3307	9.21946	0.667224
Sandaracopimaric acid	C23H38O2Si	Terpenoid	2323.79	-12.3862	9.48724	0.823867
Sandaracopimarinal	C20H30O	Terpenoid	2181.62	-18.8112	15.309	0.754254
Shikimic acid	C19H42O5Si4	Sugar	1803.97			Only in 1 sample
Stigmasta-3,5-dien-7-one	C29H46O	Triterpenoid	3423.42	-5.77824	2.9849	0.509555
Stigmasta-3,5-diene	C29H48	Triterpenoid	3104.29	-9.62819	6.2806	0.650416
Stigmastanol	C32H60OSi	Triterpenoid	3353.77	-6.3049	3.389	0.549732
Suberic acid	C14H30O4Si2	Oxygenated	1693.61	-11.3793	6.57556	0.50113
Tetracosane	C24H50	Alkane	2400	-2.07694	-1.50348	0.13177
Tetracosanoic acid, methyl ester	C25H50O2	Ester	2726.55	-3.28002	0.476717	0.163375
Tetracosanoic acid	C27H56O2Si	Acid	2833.8	-3.9389	2.11297	0.297152
Tetracosanol	C27H58OSi	Alcohol	2741.33	-4.95289	2.35589	0.239697
Tetradecanoic acid	C17H36O2Si	Acid	1845.28	-15.5734	12.1209	0.642813
Triacontane	C30H62	Alkane	3000			Only in 1 sample
Triacontanoic acid	C33H68O2Si	Acid	3423.42	-2.41321	-0.394503	Two data points
Tricosanoic acid	C26H54O2Si	Acid	2732.09	-6.31821	3.56395	0.446541
Tridecanoic acid	C16H34O2Si	Acid	1746.49	-10.4767	6.30364	0.73741
UNK-1464	C20H28O	Terpenoid	2307.99	-13.5882	10.4837	0.694934
UNK-2182	C15H26OSi	Terpenoid	2285.88	-9.44274	6.11958	0.625183
UNK-2315		Unknown	1562.68	-6.69981	3.45318	0.298598
UNK-2323		Sugar	1499.18	-11.7505	8.09981	0.663958
UNK-3176	C15H34O5Si3	Oxygenated	1693.61	-8.52155	4.53102	0.542549
UNK-3423		Sugar	1699.62	-10.4017	7.95611	0.635679
UNK-3425		Sugar	1704.43	-12.1771	8.8232	0.331548
UNK-3427		Sugar	1617.91	-15.3967	12.7104	0.410521
UNK-3440		Sugar	1712.84	-9.2492	5.67281	0.287206
UNK-3468		Nitrogen	1801.3	-9.61357	5.99193	0.18171
UNK-3471	C18H32O5Si2	Aromatic	1859.93	-14.6982	10.345	0.74813
UNK-3636		Unknown	3214.78	-7.77742	4.38107	0.613042
UNK-3661		Unknown	2682.2	-12.3442	8.20839	0.842568
UNK-3669		Unknown	2296.94	-18.6098	14.5374	0.969826
UNK-3708		Unknown	2315.89	-14.4874	11.1586	0.758088
UNK-3730	C20H24O2	Terpenoid	2403.36	-13.4686	10.1567	0.813333
UNK-3784		Sugar	1661.17	-20.3457	15.2484	0.941504
UNK-3834	C23H36O2Si	Terpenoid	2641.54	-8.65825	5.12291	0.546626
UNK-3841		Sugar	1583.06	-17.5402	13.2539	0.80932
UNK-3858	C12H28O3Si2	Oxygenated	1514.25	-12.6169	9.59223	0.698844
UNK-3860		Sugar	1708.04	-8.65841	5.6724	0.570036
UNK-386		Terpenoid	3223.79	-8.46236	4.98682	0.672558
UNK-3871	C20H30	Terpenoid	2271.66	-16.6723	13.1375	0.70192
UNK-3885		Terpenoid	2509.89	-10.6161	7.38728	0.411673
UNK-3914		Terpenoid	3100.03	-10.7121	6.86494	0.813643
UNK-3925		Unknown	2696.98	-9.28744	6.07335	0.643654
UNK-3929	C20H29O3Si2N	Nitrogen	1921.23	3.30748	-6.19808	0.0505658
UNK-3931		Unknown	1659.97	-6.19283	1.91255	0.247651
UNK-3940		Sugar	1664.77	-14.6744	10.2776	0.805278
UNK-3942		Unknown	2552.84	-10.9289	7.99946	0.832373
UNK-3959	C20H26	PAH	2360.4	-11.6699	8.7155	0.830047
UNK-3970		Nitrogen	1745.29	-16.0262	12.4723	0.866571
UNK-3976		Unknown	2246.39	-18.6904	14.9646	0.771465
UNK-3989		Sugar	1708.04	-9.7416	6.18346	0.580567
UNK-4001	C18H20	Aromatic	2173.82	-10.5915	7.59039	0.572014
UNK-4002	C14H22O3Si	Aromatic	1709.24	-9.06932	4.81203	0.603758
UNK-4015		Unknown	2643.39	-11.9863	8.35798	0.956003
UNK-4020		Sugar	1975.36	-8.46397	4.45604	0.624503
UNK-4023		Sugar	2002.93	-7.62373	3.63418	0.889373
UNK-4032	C19H26	PAH	2008.73	-10.5529	6.92261	0.303157
UNK-4033		Unknown	2240.07	-14.5932	11.198	0.776185
UNK-4039		Sugar	1639.54	-12.994	8.68882	0.749803
UNK-4040		Aromatic	2454.9	-13.5427	9.59476	0.837119
UNK-4045	C21H32O4Si2	Aromatic	2079.83	-9.81665	6.13899	0.648079
UNK-4047	C18H16	PAH	2298.51	-19.9904	16.2254	0.661658
UNK-4048		Unknown	1991.32	-7.82712	4.27205	0.218707
UNK-4054	C15H36O5Si3	Sugar	1690.01	-10.4011	6.39032	0.711103
UNK-4059		Sugar	1751.3	-8.79344	4.94521	0.58724
UNK-4075		Sugar	1399.09	-6.2452	2.93661	0.245908
UNK-4080		Triterpenoid	2825.89	-10.9771	8.12656	0.571924
UNK-4081		Sugar	1708.04	-12.0947	8.30923	0.724906
UNK-4083	C19H38O2Si	Acid	2036.3	-11.0095	8.09225	0.497961
UNK-4088		Sugar	1711.64	38.4632	-37.2889	Two data points
UNK-4089	C23H40OSi	Terpenoid	2255.86	-16.7108	12.9499	0.780618
UNK-4094		Sugar	1635.93	-17.4651	13.1312	0.775837
UNK-4098	C18H27O3SiN	Nitrogen	1882.59	-8.25988	4.61557	0.314846
UNK-4100	C22H30O3Si	Terpenoid	2485.83	-17.2579	13.5839	0.80541
UNK-4105	C14H24O2Si	Aromatic	1634.73	-10.3034	7.50863	0.559113
UNK-4107	C19H28	Terpenoid	2027.59	-10.4501	7.52874	0.192814
UNK-4108		Sugar	1621.51	-8.38277	5.85542	0.250169
UNK-4109		Sugar	1593.54	-19.4763	16.4089	0.68915
UNK-4113		Sugar	1759.97	-7.5723	5.14041	0.316915
UNK-4115		Sugar	1670.78	-15.4093	11.8773	0.742257
UNK-4117		Sugar	1688.81	-13.0101	9.73466	0.557251
UNK-4119		Nitrogen	1680.4	-25.0654	21.1658	0.916874
UNK-4126		Sugar	1680.4	-19.1621	15.1072	0.704012
UNK-4128		Sugar	1702.03	-11.9661	8.61947	0.362132
UNK-446	C19H22O	Aromatic	1951.88	-3.41082	0.411388	0.101966
UNK-821	C13H18O3Si	Aromatic	1882.59	-6.87959	2.94108	0.384063
UNK-888		Unknown	3016.99	-10.4863	6.43089	0.824851
UNK-909		Terpenoid	3055.32	-11.5475	7.6186	0.910329
UNK-AHG-HZ-SOAZ-157	C15H34O5Si3	Sugar	1769.32	9.80022	-12.2307	0.24378
UNK-AHG-LY-AMZ-140		Oxygenated	1838.22	-2.37728	-1.06812	0.0243707
Undecanedioic acid	C17H36O4Si2	Oxygenated	1998.57	-10.3946	6.61449	0.683467
Vanillin	C11H16O3Si	Aromatic	1531.47	-4.94878	2.667	0.105554
Vanillyl glycol	C19H38O4Si3	Aromatic	1957.21	-5.38055	1.52455	0.479169
Veratric acid	C12H18O4Si	Aromatic	1709.24	-16.4552	12.0645	0.866183
abietic acid	C23H38O2Si	Terpenoid	2422.83	-18.5156	15.168	0.613822
acetosyringone	C13H20O4Si	Aromatic	1760.81	-45.9992	40.3805	Two data points
azelaic acid	C15H32O4Si2	Oxygenated	1790.64	-8.9816	5.09436	0.490477
beta-sitosterol	C32H58OSi	Triterpenoid	3342.89	-7.17207	4.70002	0.466911
bornyl acetate	C12H20O2	Terpenoid	1281.64			Only in 1 sample
didehydroabietic acid	C22H30O3Si	Terpenoid	2360.4	-13.0579	11.0275	0.817527
divanillyl	C22H34O4Si2	Aromatic	2468.65	-9.79325	6.81023	0.593103
eicosane	C20H42	Alkane	2000.03	-2.00628	-1.53678	0.0334684
galactosan	C15H34O5Si3	Sugar	1656.36	-12.9414	9.16685	0.695233
gamma-Sitostenone	C29H48O	Triterpenoid	3462.6	0.0343621	-2.41029	Two data points
henicosane	C21H44	Alkane	2100.14	-11.61	7.31221	0.707396
hydroquinone	C12H22O2Si2	Aromatic	1396.94	-19.2322	14.0311	0.873147
isopimaral	C20H30O	Terpenoid	2241.65	-16.9708	13.8893	0.795494
isopimaric acid isomer	C23H38O2Si	Terpenoid	2281.14	-15.1287	12.0156	0.850551
linoleic acid	C21H40O2Si	Acid	2205.31	-10.8832	8.05689	0.564609
mannosan	C15H34O5Si3	Sugar	1677.99	-10.9801	8.02024	0.650528
nonacosan-10-ol	C32H68OSi	Alcohol	3059.58	-1.58657	-0.823475	0.0248693
pimaric acid	C23H38O2Si	Terpenoid	2307.99	-15.5797	13.0126	0.831771
pyrogallol	C15H30O3Si3	Aromatic	1533.62	-7.85001	3.79996	0.461228
retene	C18H18	PAH	2225.85	-15.2227	12.9779	0.645814
tricosane	C23H48	Alkane	2300.09	-4.62592	1.10582	0.435341
vanillic acid	C14H24O4Si2	Aromatic	1757.31	-12.2248	9.95556	0.606188
Note: Compounds identified as UNK_XXX were the unidentified compounds observed in the Fire Lab study (Jen et al., 2019). Compounds marked as QXX_XXX were the unidentified compounds not observed in the Fire Lab study. Alkanes, alcohols and carboxylic acids are n-alkanes, n-alcohols and n-carboxylic acids if not otherwise specified. Slope, intercept and R2 are for the fit log10(EF) = a*MCE + b. Aci…
EF is in g/kg fuel.

## Sheet: Particle EFs
	Emission factors in g/kg
Fire	Nethker	Nethker	Nethker	Nethker	Nethker	Nethker	Nethker	Nethker	Nethker	Arizona	Arizona
MCE	0.902016	0.910245	0.883918	0.946133	0.920896	0.937027	0.862558	0.929035	0.945115	0.951938	0.96303
(1R,4aS,7S)-7-Ethenyl-1,4a,7-trimethyl-9-oxo-2,3,4,5,6,8,10,10a-octahydrophenanthrene-1-carboxylic acid	0.00537891	0.00185109	0.00274352	0.000425871	0	0.000583192	0.00561981	0.000372048	0	0	0.000998545			`
(2R,3R,4R,5S)-Hexane-1,2,3,4,5,6-hexaol	0.00110672	0	0	0	0	0	0	0	0	0	0
(3S,4bS,8R,10aS)-4b,8-Dimethyl-2-(propan-2-yl)-4,4a,4b,5,6,7,8,8a,9,10-decahydro-3H-3,10a-epidioxyphenanthrene-8-carboxylic acid	0.00488437	0.00256791	0.00258433	0.000301875	0	0.000637242	0.00718296	0	0	0.00250742	0.00107743
1,2,4-Benzenetriol	0.00165816	0.00066091	0.000487668	0	0.00160458	0	0.000277126	0.00206626	0	0	0
1-(10-Methylanthracen-9-yl)ethanone	0.00745483	0.0158128	0.00974225	0.00423266	0.00588892	0.00523686	0.0347023	0.00230086	0.00121414	0.00230693	0.000943239
1-4,3-6-Dianhydro-alpha-d-glucopyranose	0.038879	0.0239075	0.0255298	0.00583217	0.0466826	0.00855067	0	0.00703632	0	0.00373299	0
1-Eicosanol	0.00254922	0.00277986	0.00215212	0.000508466	0.00166166	0.00111406	0.00183935	0.000981015	0.000780848	0.00139235	0.00076975
1-Heneicosanol	0.000200756	0	0	0	0	0	0	0	0	0.000209919	0.000127128
1-Hexacosanol	0.00100316	0.000829939	0.00069824	0.000132184	0	0.000538141	0	0.000237428	0.000217822	0.000393077	0.000559542
1-Hexadecanol	0.000425921	0.000464485	0.000191502	0.000105569	0.000441088	0.00018697	0.000324197	0.000165921	0.000173234	0.000106844	0
1-Monopalmitin	0.00156826	0	0.00199073	0	0	0	0	0	0	0	0
1-Naphthalenecarboxylic acid, decahydro-5-(5-hydroxy-3-methylpentyl)-1,4a-dimethyl-6-methylene-, (1R,4aS,5R,8aS)-	0.00573133	0	0	0	0	0	0.0129706	0	0	0	0
1-Octadecanol	0.000452356	0.000844711	0.000479385	0.000180516	0	0.000342	0.000474445	0.000261765	0.000183539	0.000239836	0.000135086
1-Tetracosene	0.00180438	0.00258225	0.0016808	0.000435795	0	0.000867602	0.00204005	0.000371098	0.000400286	0.00164057	0.000831215
10,18-Bisnorabieta-5,7,9(10),11,13-pentaene	0.0125064	0.0720557	0.0320627	0.0129708	0.0647462	0.00986164	0.0352957	0.00497962	0.00238406	0.00113891	0.000712549
10,18-Bisnorabieta-8,11,13-triene	0.00235345	0.00444272	0.00486269	0.000910856	0	0.00128752	0.0103884	0.000601531	0	0	0
11-Eicosenoic acid, (Z)-	0.0016394	0	0.001262	0	0	0.000960924	0	0	0	0.000834979	0.000446739
16-Hydroxyhexadecanoic acid	0.0125137	0.0101041	0.0100307	0.00209894	0	0.00300336	0.00566428	0.00153562	0.00103592	0.00339302	0.00188669
2, 4-Dihydroxyacetophenone	0.00907695	0.00453221	0.00803716	0.00081614	0.000562686	0.00122896	0.00399819	0.000446619	0.000445457	0.000909216	0.000452299
20-hydroxyeicosanoic acid	0.00416615	0	0.004804	0.000917569	0	0.00151376	0.00438587	0	0	0.00136099	0.00143103
3,4-Dihydroxybenzaldehyde	0.00316947	0	0.00182147	0	0	0.00112222	0.00292539	0	0	0.000710525	0
3,4-Dihydroxybenzoic acid	0.00386148	0.00462627	0	0.00090613	0.0017176	0.000619693	0.00258057	0.000679785	0.000941277	0.000609294	0.000369424
3-(Methylthio)benzoic acid	0.00336706	0.00114669	0.00249162	0.000256316	0	0.000590142	0.0031952	0.00019638	0	0	0
3-Hydroxy-4-methyl-6H-benzo[c]chromen-6-one	0	0	0	0	0	0	0.00311099	0	0	0.00128592	0.000397683
3-Hydroxybenzoic acid	0.00110904	0.00117932	0	0	0	0	0.000524576	0	0	0	0
3-Vanilpropanol	0.0212678	0.0320521	0.022259	0.0049797	0.00504287	0.00793084	0.0257751	0.00166911	0.00199744	0.00308179	0.00196751
3-methyl-5-nitrocatechol	0.00217663	0.00120571	0.00109838	0.00019352	0	0.000603646	0	0.000884899	0.0010725	0.0104235	0.00351539
4,4-(Tetrahydrofuran-3,4-diyldimethanediyl)bis(2-methoxyphenol)	0.00538848	0.00457434	0.00461867	0.000810898	0.000897679	0.0016401	0.00537197	0.000481053	0.000454208	0.00280064	0.0034995
4-Coumaric acid	0.000332339	0.000528908	0.000344699	0	0	0.00014003	0	0	0	0	0
4-Hydroxybenzoic acid	0.00218013	0.0024799	0.00510077	0.000628369	0	0.000970724	0.00136502	0.000383028	0.000461255	0.000823249	0.000400599
4-methyl-5-nitrocatechol	0.000564972	0.000250204	0.00014538	0	0	0.000137691	0	0.000509513	0.000525244	0.00881397	0.00238881
4-nitrocatechol	0.00329047	0	0.000656308	0	0	0	0	0.000841282	0.00183011	0.0139531	0.00703466
4b,8-Dimethyl-2-isopropylphenanthrene, 4b,5,6,7,8,8a,9,10-octahydro-	0.00118305	0.0119766	0.00858033	0.00366364	0.0606396	0.00066102	0.00148289	0.000817798	0.00199424	0.000357155	0.000255977
5-(hydroxymethyl)furfural	0.0600623	0.0193584	0.0182249	0.00495601	0.0375329	0.00757658	0	0.0085591	0.00800855	0	0
6,4'-Dimethoxy-7-hydroxyisoflavone	0.00583308	0.00807846	0.0112448	0.00114051	0.000974403	0.00235532	0.00569544	0.00066327	0.000560657	0.00255454	0.00233139
7-Isopropyl-1,1,4a-trimethyl-1,2,3,4,4a,9,10,10a-octahydrophenanthrene	0.00138795	0.00330308	0.00249586	0.000914576	0.00509127	0.000623692	0	0.000434262	0.000578664	0	0.00018909
7-Oxodehydroabietic acid methyl ester	0.0199907	0.0251719	0.0307769	0.00381536	0.00327536	0.00438683	0.0386973	0.00270243	0.00218997	0.00472896	0.00204362
7-Oxodehydroabietic acid	0.0435146	0.03043	0.0427015	0.00300559	0.00362786	0.0065144	0.0663537	0.00286371	0.00244774	0.00415174	0.00215988
8-Isopropyl-1,3-dimethylphenanthrene	0.0206633	0.084208	0.0513161	0.0215012	0.0134797	0.020104	0.13342	0.00826228	0.00336076	0.00462706	0.00254977
9-Ethyl-10-methylanthracene	0.00115714	0.00462082	0.00249209	0.00159931	0.00520133	0.000655824	0.00673805	0.000321224	0.000265979	0.000350613	0.000161129
9-Hydroxynonanoic acid	0.000957921	0.00106177	0.000746111	0.000155053	0	0.000394233	0.000846701	0.000230463	0	0.000242317	0.000144852
9-Methylanthracene	0.00169503	0.00195672	0.00240764	0.00031069	0	0	0	0	0	0	0
9-Tetradecenoic acid	0.00587434	0.00234191	0.00722756	0.00117778	0	0.00256174	0.00205771	0.000125475	0	0	0
Acenaphthene	0	0.0103953	0.00481538	0	0	0	0	0	0	0	0
Acetovanillone	0.00684252	0.0068543	0.00636484	0.00155158	0.011341	0.00504164	0.00222519	0.00137817	0.00256962	0.000614792	0.000431312
Adonitol	0.00141756	0	0	0	0	0	0	0	0	0	0
Benzene, 1,3-dimethoxy-5-[(1E)-2-phenylethenyl]-	0	0	0	0	0	0	0	0	0	0	0
Butanedioic acid	0.00723281	0	0.00353683	0	0	0	0	0	0	0	0
C16 acid isomer 1	0.00141495	0	0.00311053	0	0	0.000975629	0.000812434	0.0011007	0	0	0.000305494
Campesterol	0.00641952	0	0.00631056	0	0	0.00439142	0.00658625	0	0	0	0
Coniferyl alcohol	0.00104997	0.00151043	0.000707024	0.000260479	0	0	0.000929816	0	0	0	0
Coniferyl aldehyde	0.0110681	0.011477	0.0109322	0.000945106	0.00248948	0.00375115	0.0121678	0.00154782	0.00133305	0.00267955	0.000967545
Dehydroabietal	0.0174542	0.057592	0.0253956	0.0130073	0.00873367	0.0137623	0.102646	0.00439303	0.00124127	0.00234866	0.00102695
Dehydroabietic acid	0.450652	0.770655	0.524938	0.142418	0.426425	0.17529	0.909993	0.137186	0.142286	0.213207	0.102434
Dehydroabietinol	0.0120515	0.0187701	0.0205213	0.00325807	0.00408657	0.00357685	0.0153478	0.00185287	0.00174266	0.00513333	0.00306212
Deoxy-ribo-hexonic acid 1-4-lactone	0.00218316	0.0041069	0.00409388	0.00112209	0	0.00228627	0.00332163	0.000829691	0.00101301	0.000742147	0.000672517
Docosanoic acid, methyl ester	0.00438289	0.00961673	0.00626748	0.00177123	0.00251605	0.00295534	0.00577672	0.002273	0.00158855	0.00530142	0.00347111
Docosanoic acid	0.326893	0.267841	0	0.0463146	0.0471011	0.0892129	0.119924	0.0647261	0.0539851	0.11329	0.0725228
Docosanol	0.00404123	0.00455438	0.00383901	0.00083468	0.000845557	0.00166808	0.00290467	0.000824944	0.000652747	0.00223295	0.00233605
Dodecanoic acid	0.00223311	0.00208034	0.00112747	0.000297584	0.0019752	0.000569268	0.000954769	0.000622281	0.000776397	0	0.00019626
Eicosanoic acid, methyl ester	0.00113167	0.00294096	0.00158351	0.000718788	0.00083348	0.0010805	0.00251175	0.000735339	0.000393628	0.000518648	0.000269123
Eicosanoic acid	0.465861	0.251166	0.288394	0.0424665	0.061792	0.100049	0.18736	0.0624789	0.0531137	0.106697	0.0433593
Epiambrettolic acid	0.00431796	0.00604339	0.00622054	0.00109515	0	0.00143386	0	0	0	0	0
Ferulic acid	0.0018714	0	0	0.000253405	0	0.000805569	0	0.000410363	0	0	0.000214812
Fluoranthene	0.000633586	0	0	0	0	0	0	0	0	0	0
Heneicosanoic acid	0.0211044	0.0148434	0.0148568	0.00279872	0	0.00533234	0.00941621	0.00350607	0.00442053	0.0100223	0.00582296
Heneicosene	0.000200794	0.000429427	0.000199009	0.000122264	0	0.00013676	0.000354941	0	0	0	0
Hentriacontane	0.000847079	0.00138978	0.000645369	0	0	0.000807431	0	0.000381982	0	0	0
Heptacosane	0.00070219	0.000967924	0.000732791	0.000214952	0	0.000379389	0.000654843	0.000247548	0.000329992	0.000571179	0.000510504
Heptadecanoic acid isomer	0.0249049	0.0656102	0.0524686	0.0116853	0.00865747	0.0165862	0.0691798	0.00847202	0.00523684	0.00394879	0.00105753
Heptadecanoic acid	0.00693405	0.00976868	0.00605479	0.00201142	0.00348508	0.00296981	0.00686292	0.00247029	0.00183938	0.00317939	0.000884864
Hexacosane	0.000787584	0	0.00109577	0	0	0	0	0	0	0	0
Hexacosanoic acid	0.017911	0.00975313	0.00757631	0.000982903	0	0.00694564	0.0058653	0.00319379	0	0.00645288	0.00817746
Hexadecanoic acid, methyl ester	0.000966153	0.00367339	0.00169261	0.000793246	0.00563384	0.000761816	0.00312311	0.000624452	0.000713318	0	0
Hexadecanoic acid	0.115274	0.211594	0.131496	0.0361705	0.0889473	0.0569908	0.112869	0.0574326	0.0410759	0.0701291	0.0174438
Hexonic acid, 3-deoxy-, gamma-lactone, 2,5,6-tris-OH	0.00122809	0.00145062	0.00100662	0.000626275	0	0	0.000589991	0	0	0.000456813	0.000227507
Homovanillic Acid	0.00632897	0.00529137	0.00520082	0.000723826	0.00108397	0.00150025	0.0038103	0.000881408	0.00102621	0.00105549	0.000337229
Isophthalic acid	0.00421507	0.00151495	0.00157657	0.000464203	0.000524414	0.00104675	0	0.000173279	0.000243125	0.000407601	0.000168092
Isopimaric acid, methyl ester	0	0.00661174	0.00540476	0.0007564	0.00135362	0	0.0088164	0.000390504	0	0	0
Isopimaric acid	0.240183	0.287355	0.247815	0.0458221	0	0.0599234	0.456006	0.0409163	0.0166605	0.0289177	0.0143765
Juvabione	0.00444897	0.00821926	0.00647249	0.00115784	0	0.00132253	0.0041649	0	0	0	0
Kaur-16-en-18-ol, (4-alpha)-	0.0249054	0.0794203	0.0505894	0.0157894	0.00798971	0.0175503	0.169331	0.00562742	0.00263562	0.00126975	0.000587461
Levoglucosan	2.00424	1.22888	1.34881	0.235453	0.273109	0.457487	1.6229	0.20529	0.117184	0.240924	0.0792761
Levopimaric acid	0.00574272	0.0125416	0.00546535	0.00346004	0.00701182	0.00359058	0	0.00453465	0.00203493	0.00304895	0.00144308
Manool	0.0139668	0.0159698	0.0102478	0	0	0	0	0	0	0	0
Matairesinol, (3R-E)-,	0.00111287	0	0.000378415	0.000202226	0	0.00021953	0.00211792	0	0	0.000241324	0.000174895
Methyl 3,4-dihydroxybenzoate	0.00189597	0.00204357	0	0.000351143	0	0.000552225	0.00105676	0.000227916	0.00021374	0	0
Methyl dehydroabietate	0.0585094	0.276082	0.164151	0.0470973	0.142239	0.0482731	0.246022	0.0288618	0.0235392	0.0359011	0.013906
Methyl vanillate	0.0162271	0.0161439	0.0121275	0.00343626	0.0146455	0.00962243	0	0.00331955	0.0039789	0.000679495	0.000651093
Naphthalene, 1,2,3,4-tetrahydro-6-(1-phenylethyl)-	0	0	0.0057754	0	0	0	0.00342126	0	0	0	0
Nonacosane	0.000946062	0.00137115	0.000868297	0.000275846	0	0.000802255	0.000496231	0.000440946	0.000392453	0.00031047	0.000365626
Nonadecanoic acid	0.0156153	0.0206056	0.0193834	0.0034642	0	0.00563375	0.0255803	0.00425047	0.00367348	0.00663053	0.00382812
Octacosanoic acid	0.00500052	0.0078416	0	0	0	0.00394438	0	0	0	0.00580829	0.00995772
Octadecanoic acid	0.0162275	0.0273749	0.0160808	0.00552849	0.00814978	0.00924024	0.0173214	0.0068131	0.00351488	0.0080239	0.00190185
Octadecenoic acid	0.00591621	0.0952082	0.11535	0.00499074	0	0.00633854	0.0167392	0.00456146	0.00121838	0.00123982	0.00033767
Palustric Acid	0.0740149	0.16139	0.12956	0.0228734	0.0244044	0.0316971	0.243942	0.0210344	0.00781047	0.0187093	0.00631435
Pentacosane	0.000217158	0.000475663	0.000213722	9.39404e-05	0	0.000186554	0	0.000159087	0.000142722	0.000351939	0.0002171
Pentacosanoic acid	0.00408858	0.00597235	0.00370892	0.000886218	0	0.00258222	0.00311361	0.00137177	0	0	0.00413904
Pentadecanoic acid isomer 1	0.00230971	0.00288507	0.00143566	0.000569906	0.00219275	0.00111683	0.00134127	0.00103491	0.00136904	0.000432439	0.000204322
Pentadecanoic acid isomer 2	0.00357934	0.00418973	0.00298051	0.000876452	0	0.00169858	0.00375598	0.00119254	0	0.000625816	0.000291437
Pentadecanoic acid	0.00792821	0.00716601	0.00504325	0.00184481	0.00247477	0.00250938	0.00483725	0	0.00138122	0.0019609	0.00101735
Phenanthrene, 1,7-dimethyl-	0.00376086	0.0096923	0.00446771	0.00398765	0.0205188	0.00212706	0.0112113	0.00170346	0.00127721	0.000397712	0.000303213
Phenanthrene, 2,3,5-trimethyl-	0.0174376	0.0655557	0.0363025	0.0137437	0.0290616	0.0125346	0.0677135	0.00719854	0.00344504	0.00351009	0.00150154
Pyroglutamic acid	0	0	0	0	0	0	0	0	0	0	0
Q2-287	0.0116273	0.00726375	0.00961268	0.00125333	0.00039154	0.00336111	0.00937139	0.000458698	0.00044336	0.00114339	0.000505009
Q2-3009	0.0191946	0.044083	0.0277206	0.0058946	0.00810744	0.00824877	0.0648656	0.00543424	0.00300421	0.00497664	0.00191844
Q2-478	0.00099971	0.00520989	0.0017963	0.000795024	0.000648233	0.00126044	0.00246113	0.000641189	0.000418361	0	0
Q2-479	0.0127898	0.00968129	0.012663	0.00207738	0.00173496	0.00527223	0.0154775	0.00409806	0.00142675	0.000318061	0.000220647
Q2-47	0.0398111	0.0264101	0.0239323	0.00471042	0.00163488	0.00895421	0.0320983	0.00220076	0.00147419	0.000826936	0.000563085
Q2-494	0.00316592	0.00357977	0.00277198	0.000464431	0.000879828	0.000915268	0.00269731	0.000781915	0.000511545	0.000109052	6.95102e-05
Q2-499	0.0228507	0.0920849	0.048817	0.00774702	0.00545479	0.0213129	0.039814	0.0113909	0.00153695	0.00160373	0.000741168
Q2-517	0.0558324	0.0310112	0.0212375	0.00945823	0	0.00799417	0.0342108	0.00492594	0.00398405	0	0
Q2-537	0.00502426	0.00316188	0.00495023	0.000537887	0.000855444	0.00107917	0.00384265	0.000405328	0.00044214	0.000367112	0.000201516
Q2-546	0.0043979	0.00323047	0.00403431	0.000582372	0.00113767	0.00115992	0.00376814	0.000327631	0.000475987	0.00030075	0.000149567
Q2-551	0.0134311	0.0398192	0.0069926	0.00308793	0.00520721	0.00477711	0.0566176	0.00957272	0.0043168	0	0
Q2-558	0.0126216	0.0459787	0.014793	0.00432808	0	0.00843742	0.101849	0.0698226	0.00371569	0	0
Q2-560	0.00434579	0	0.00199227	0	0	0	0.00166941	0	0	0.000522503	0.000280626
Q2-572	0.00622649	0.00754038	0.0038899	0.00147031	0.0112311	0.00423528	0.0172251	0.00259906	0.00185975	0	0.000354208
Q2-593	0.00945296	0	0.00667697	0	0	0.000962474	0.00819073	0	0	0.000558224	0
Q2-601	0.00100437	0.00180138	0.000904297	0.000415762	0	0.000417684	0.0060864	0.000502401	0.000172396	0	0
Q2-608	0.0403461	0	0.0380999	0	0	0.00327779	0.0287756	0	0	0	0.00465192
Q2-613	0.00234515	0	0	0	0	0	0	0	0	0	0.000257708
Q2-618	0.000736321	0	0.000137407	0	0	0	0.000146221	0	0	0	0
Q24-198	0	0	0	0	0	0	0	0.000354726	0.000325559	0.00206248	0.00077351
Q33-456	0	0	0	0.00981288	0.00605734	0	0.0410187	0	0.00151092	0	0
Sandaracopimaric acid	0.0255112	0.0345183	0.0294109	0.00583132	0.00939565	0.00813526	0.0616636	0.0043199	0.00436701	0.00785283	0.00392179
Sandaracopimarinal	0.015406	0.0523014	0.023355	0.00878763	0.0203782	0.00962585	0.11086	0.00316421	0.00169292	0.00160905	0.000867259
Shikimic acid	0.00101295	0	0	0	0	0	0	0	0	0	0
Stigmasta-3,5-dien-7-one	0.00784936	0.00972516	0.00667006	0.00196617	0	0.00681903	0.00802933	0.00248318	0.00227733	0.00307181	0.0033983
Stigmasta-3,5-diene	0.00313154	0.00695151	0.00623908	0.00146221	0	0.00463119	0.00764442	0.00130304	0.000661638	0.00122535	0.00114083
Stigmastanol	0.00442166	0.00856426	0.00642811	0.00154046	0	0.00395483	0.0071156	0	0	0	0
Suberic acid	0.000491893	0	0.00019029	2.2311e-05	0	6.93703e-05	0	0	9.02915e-05	9.95579e-05	0
Tetracosane	0.000442257	0.000669861	0.000477187	0.000149466	0	0.000307682	0.000440759	0.00031559	0.000292315	0.000599443	0.000391735
Tetracosanoic acid, methyl ester	0.00236605	0.00542084	0.00428217	0.00102963	0	0.00155254	0.005311	0.00179822	0.00175886	0.00495262	0.00422378
Tetracosanoic acid	0.0630924	0.0519454	0.0480499	0.0113553	0.0228563	0.0285478	0.0380589	0.0191393	0.0196745	0.0399182	0.0269704
Tetracosanol	0.0159762	0.0113728	0.0105059	0.00209131	0	0.00495962	0.00935972	0.00234405	0.00221197	0.00819784	0.0087554
Tetradecanoic acid	0.02426	0.0206281	0.0230922	0.00298575	0.00179291	0.0146144	0.0212356	0.00620699	0.00230146	0.00109465	0.000564884
Triacontane	0.000350656	0	0	0	0	0	0	0	0	0	0
Triacontanoic acid	0.00268376	0	0.0029677	0	0	0	0	0	0	0	0
Tricosanoic acid	0.0145248	0.0130409	0.0126678	0.00248037	0.00330365	0.00491013	0.00771817	0.00284263	0.00259875	0.00514309	0.00407015
Tridecanoic acid	0.00140537	0.00115353	0.00104962	0.0001924	0.00033223	0.000476829	0.001093	0.000245219	0.000245521	0	0.000131148
UNK-1464	0.0150205	0.0370768	0.0196445	0.00897158	0.00407356	0.0107163	0.0639415	0.00671218	0.00155603	0.00399539	0.00206745
UNK-2182	0.00566532	0.00898185	0.00816119	0.00137754	0.00187098	0.00201783	0.0051381	0.00138007	0.000777495	0.00225457	0.00105851
UNK-2315	0.0046256	0	0	0.000409534	0.00603521	0.000797945	0.00260878	0	0.00174614	0.00212042	0.000811675
UNK-2323	0.00329797	0.00560823	0.00313406	0.000670131	0	0.00116761	0	0.00164416	0	0	0
UNK-3176	0.00178989	0.000766034	0.000747215	0	0	0	0.000992235	0	0	0.00016219	0
UNK-3423	0.0771083	0.0622125	0.0665395	0.0115699	0.0212669	0.0215191	0.0544343	0.00764602	0.00944219	0.0144093	0
UNK-3425	0.0291143	0.00798215	0.0331966	0.000753809	0.000667615	0.00919967	0.00802151	0.000727339	0	0.00650418	0.000971286
UNK-3427	0.203858	0.10288	0.159273	0.0169611	0.0025132	0.038266	0.186429	0	0	0	0
UNK-3440	0.00425071	0.00267679	0.0139577	0.000531974	0	0.000969569	0.0017139	0.000208301	0.00026832	0.00277567	0.00102448
UNK-3468	0.00215071	0.00249154	0.000794183	0.000409987	0.0228587	0.00128826	0	0.000552649	0.0012662	0.000270403	0.000424303
UNK-3471	0.00295143	0.00159603	0.00199693	0.000332684	0	0.000556076	0.00324782	0.000157771	0.000115239	0.000321585	0.00017826
UNK-3636	0.00264158	0.00325562	0.00334482	0.000604074	0	0.00188721	0.00442846	0.000663033	0.000673735	0.00116408	0.00137771
UNK-3661	0.0018298	0.00152155	0.00206638	0.000241606	0	0.000371375	0.00286454	0.000293352	0	0	0.000314829
UNK-3669	0.00595294	0	0	0	0.00156283	0	0.0347092	0	0	0.000943858	0.000388916
UNK-3708	0.00887216	0.0248412	0.0135027	0.0061454	0.00516739	0.00848649	0.0456827	0.00457486	0.00178974	0.0019147	0.000813228
UNK-3730	0.0100485	0.0205837	0.0179545	0.00314931	0.00339763	0.00369379	0.0317479	0.00227245	0.00171167	0.00347274	0.00155671
UNK-3784	0.000925241	0.000591029	0.000989836	0.000102289	0	0	0.00697909	0	0	0	0
UNK-3834	0.00417706	0.00207271	0.00255111	0.000395069	0.0022	0.00105912	0.00383897	0.000435427	0.00065286	0.00162722	0.00078812
UNK-3841	0.00758625	0.00377597	0.0040083	0.000610643	0.000563779	0.00133106	0.00853132	0.000570869	0.000552869	0.000279835	0.000134143
UNK-3858	0.0258993	0.043143	0.0209574	0.00511732	0.00867587	0.00697188	0.0223917	0.0115103	0.00453347	0.0023804	0.00133081
UNK-3860	0.0161533	0.013833	0.0115352	0.00191486	0.00688684	0.00377839	0.00620742	0.00311003	0.00269106	0.00333367	0.00141169
UNK-386	0.00245086	0.00373387	0.00313332	0.000611827	0	0.00213556	0.00406549	0.000735896	0.000651938	0.00076114	0.00101586
UNK-3871	0.0104	0.0312894	0.0168537	0.00658073	0.00247851	0.00894778	0.0458212	0.00486971	0.00198785	0.00113767	0.000446426
UNK-3885	0.0209919	0.00665508	0.0225415	0.0019872	0.00177	0.00256009	0.0102187	0.000713252	0.000862755	0.00576414	0.00297885
UNK-3914	0.00183862	0.00303139	0.00189365	0.000658616	0	0.000746062	0.00341296	0.000573833	0.000373151	0.00058218	0.000264424
UNK-3925	0.00738975	0.00736298	0.00821174	0.00125238	0	0.00195838	0.00952579	0.000940294	0	0.00262284	0.00197104
UNK-3929	0.00218109	0	0.000357485	0	0	0.000426443	0	0.000216657	0	0.002645	0.000879346
UNK-3931	0.000920001	0	0.000375433	3.47648e-05	0	7.94433e-05	0.000150238	0	0	0.000241963	8.41353e-05
UNK-3940	0.00281544	0.00121588	0.00173596	0.000200518	0	0.000413237	0.00278036	0.000202314	0	0.000208787	0
UNK-3942	0.020985	0.0167163	0.0202163	0.00359551	0.00766794	0.00627908	0.0334445	0.00324934	0	0.0055537	0.00319576
UNK-3959	0.018312	0.0290193	0.0231237	0.00493553	0.00551601	0.00688985	0.0361765	0.00571228	0.00377532	0.00574698	0.00242484
UNK-3970	0.0215267	0.0142887	0.0183222	0.00201803	0.00359452	0.00411549	0.0302363	0.00177431	0.00220749	0.00177498	0.000889939
UNK-3976	0.0115349	0.0339639	0.0251417	0.00541487	0.0025947	0.00572675	0.0433099	0.00393024	0.00140923	0.000948081	0.00040907
UNK-3989	0.00517773	0.00374052	0.00410469	0.000740441	0.00161673	0.00205198	0.00321547	0.000699671	0.000585174	0	0
UNK-4001	0	0.0225275	0.0181398	0	0	0.00250614	0.01941	0	0	0	0
UNK-4002	0.00080002	0.000533507	0.000492249	6.86719e-05	0.000339153	0.000234133	0.000699166	0.000184231	0.000272762	0	0
UNK-4015	0.00467928	0	0	0.000909343	0	0	0.00898602	0	0	0	0
UNK-4020	0.00103636	0.00135889	0.000870932	0.000251652	0	0.000275566	0.00105407	0.000153655	0	0.000300996	0.000226494
UNK-4023	0.000698992	0	0.000955157	0	0	0.000276559	0.000868648	0	0	0.000309374	0.000149688
UNK-4032	0.00126001	0.00885404	0.00686116	0.00250774	0.0109204	0.00080563	0.00154215	0.000815587	0.00111069	0.000287037	0.00015357
UNK-4033	0.0110571	0.0240665	0.0142032	0.00359653	0	0.00642356	0.0292085	0.00345552	0.00122028	0	0.000856432
UNK-4039	0.00205234	0.000792991	0.0010064	0.000133011	0	0.000226145	0	0	0	0.000287277	0.000192238
UNK-4040	0.00356627	0.00392433	0.00414165	0.000617175	0.000879721	0.000758306	0.00672644	0.000497577	0.000468571	0.00082788	0.000368746
UNK-4045	0.0034091	0.00345545	0.00294883	0.000922508	0.00152379	0.00077188	0.00271219	0.000460073	0.000438239	0.00102993	0.000350079
UNK-4047	0.00948229	0.0634207	0.0350335	0.00904188	0.00155661	0.00858979	0.0719791	0.00362317	0.000953076	0.00138278	0.00039475
UNK-4048	0.000700234	0.00680693	0.00386898	0.000797284	0.00265708	0.000979768	0.0010607	0.00180256	0.000753733	0.000113874	0
UNK-4054	0.00272853	0.00119854	0.00174939	0.000221522	0.00047392	0.000410286	0.00133185	0	0	0.000430051	0.000184347
UNK-4059	0.00288187	0.000370901	0	0	0	0.000565088	0.00182702	0	0	0.00047051	0.000227075
UNK-4075	0.00426925	0.00547495	0.00495731	0.000588375	0	0.000985164	0.000976511	0.00104367	0	0.000840794	0
UNK-4080	0.0285456	0.0263511	0.0393956	0.00210354	0	0.0074184	0.0283083	0.0032653	0.0027544	0.0108006	0.00678862
UNK-4081	0.00715315	0.00333753	0.00335505	0.000797001	0.00176212	0.00131509	0.0042441	0.000487802	0.000606647	0.000641808	0.000347019
UNK-4083	0.0485642	0.0211779	0.0286085	0.00458391	0.00247001	0.00730119	0.0272721	0.0027435	0.00238624	0.0107726	0.0037771
UNK-4088	0.0025442	0	0.000512174	0	0	0	0	0	0	0	0
UNK-4089	0.0058943	0.0169642	0.0117676	0.00376218	0.00207298	0.00385883	0.029089	0.00212534	0.000885182	0.000843206	0.000388264
UNK-4094	0.00576119	0.00398961	0.00572858	0.000265252	0	0.00110612	0.00370962	0	0.000324117	0	0.000103137
UNK-4098	0.00615197	0.00201709	0.0014899	0.000299145	0.000859509	0.000452438	0.0026775	0.000189313	0	0.00175897	0.000669752
UNK-4100	0.015931	0.0139003	0.0255085	0.00317448	0.00161897	0.00261331	0.049298	0.00135979	0.001193	0.00250019	0.00110011
UNK-4105	0.028009	0.022207	0.0177069	0.00837583	0.027829	0.0116983	0.0224608	0.00360032	0.00720354	0.00390625	0.00144898
UNK-4107	0.00421005	0.0529754	0.0304982	0.0140262	0.146268	0.00468042	0.00549801	0.00607602	0.0064633	0.000882101	0.000429332
UNK-4108	0.0822811	0.00471803	0.0515543	0.00925867	0.00263314	0.0148834	0.0332809	0.0126976	0.0145694	0	0
UNK-4109	0.240977	0.102209	0.201771	0.0231871	0.00596366	0.047231	0.169614	0.0133338	0.00702171	0.00464491	0.00249632
UNK-4113	0.081691	0.0525704	0.0261267	0.00836041	0.00644814	0.0117669	0.0178972	0.0089402	0.00389012	0.0198336	0.00533757
UNK-4115	0.0327182	0.0107258	0.01835	0.00193646	0.00191844	0.00518182	0.0245763	0.00158187	0.00146141	0.00238	0.000981614
UNK-4117	0.03652	0.0138162	0.0323688	0.00291921	0.00216566	0.00546077	0.0141014	0.00131016	0.00127919	0.00433192	0.00174972
UNK-4119	0.0322143	0	0	0	0	0	0	0	0	0.00372337	0.000644961
UNK-4126	0.0182974	0.00452342	0.0107628	0.000864432	0	0.00301865	0	0.000399434	0.00090365	0.000973222	0.000496019
UNK-4128	0.028501	0.0122222	0.0293866	0.0015267	0.00103663	0.00500177	0.0066816	0.000868885	0.000474276	0.00580359	0.00166964
UNK-446	0.00217521	0.00527603	0.00277172	0.0013286	0.00598775	0.00126969	0.00144661	0.00108003	0.000807408	0	0
UNK-821	0.00171195	0.000487901	0.000448942	0	0	0	0.000763451	0	0	0.000164821	0
UNK-888	0.00108548	0.00165351	0.000928921	0.000414364	0.000596802	0.000497997	0.00224211	0.000343499	0.000266156	0.000282636	0.000161484
UNK-909	0.0013244	0.00248298	0.00220502	0.000542469	0	0.000680613	0.00412245	0.000652322	0.000505623	0.000465117	0.000230118
UNK-AHG-HZ-SOAZ-157	0.00369322	0	0	0	0.000283064	0	6.40109e-05	0	0	0.000792345	0
UNK-AHG-LY-AMZ-140	0	0	0.000987683	0.000165356	0	0	0	0.0002215	0	0.00231318	0.000421938
Undecanedioic acid	0.00259876	0.00309728	0.00290567	0.000732818	0	0.00129576	0.00204621	0.000689492	0	0.000411378	0.000195823
Vanillin	0.0340378	0.0400176	0.013728	0.00848723	0.081404	0.0149801	0.00592379	0.00939587	0.0168766	0.00276818	0.00248716
Vanillyl glycol	0.0008663	0.000690535	0.000446563	0.000146089	0	0.000224837	0.000575619	0	0	0.00040544	0.000200028
Veratric acid	0.00245722	0.00186316	0.00223773	0.000250004	0	0.000468881	0	0.000325586	0.000381383	0.000393859	0.000128076
abietic acid	0	0.0756093	0.103092	0.0281836	0.00345953	0.00788296	0.122872	0.00241985	0.00155219	0.00473295	0.00197674
acetosyringone	0	0	0	0	0	0	0	0	0	0.000390957	0.00012076
azelaic acid	0.00425815	0.00139553	0.00111968	0.00018141	0.00051695	0.000551211	0.00116802	0.000326224	0.000397447	0.000603654	0.000229104
beta-sitosterol	0.0228062	0.0352691	0.0270178	0.00538175	0.00794863	0.0159946	0.0241297	0.00554427	0.00390614	0.00975998	0.0102354
bornyl acetate	0	0	0	0	0	0	0	0	0	0	0
didehydroabietic acid	0.23946	0.34711	0.261493	0.0561674	0.0520662	0.0848357	0.456143	0.0550008	0.0390143	0.0503296	0.0206895
divanillyl	0.0140181	0.0152946	0.0158811	0.00280903	0.00632238	0.00292686	0.0200061	0.00179298	0.00177859	0.00635149	0.00433279
eicosane	0.000242254	0.000890893	0.000409074	0.000230889	0.00190243	0.000224686	0.000421197	0	0.000301564	0	0
galactosan	0.00672961	0.00586195	0.0047889	0.00100104	0.00212279	0.00210091	0.00442292	0.000655728	0.000951826	0.0004349	0.000281932
gamma-Sitostenone	0.00417544	0	0	0	0	0	0.00416243	0	0	0	0
henicosane	0.000556572	0.00128397	0.000801795	0.000307576	0.000720149	0.000437766	0.00134086	0.000276322	0.000273568	0.000125921	5.2445e-05
hydroquinone	0.000335149	0.00063619	0.000961469	5.79509e-05	0	0	0	0	0	0	0
isopimaral	0.0480878	0.0813913	0.0525548	0.0122023	0.0219094	0.0150475	0.123301	0.00752956	0.00275147	0.007499	0.00197416
isopimaric acid isomer	0.0173901	0.0462023	0.0458217	0.00695707	0.0087358	0.00856792	0.0834245	0.00505047	0.00346178	0.00615205	0.00224548
linoleic acid	0.0064483	0.0544681	0.0295114	0.00612369	0	0.0105865	0.0393119	0.00791325	0	0.00274495	0
mannosan	0.0228961	0.0280466	0.0239227	0.00431919	0.0129658	0	0.015208	0.00261439	0.00436957	0.00347518	0.00202485
nonacosan-10-ol	0.0086766	0.0135743	0.0116363	0.00240188	0.004072	0.0049636	0.00332034	0.00173477	0.00233241	0.00940569	0.00813577
pimaric acid	0.101485	0.165823	0.139618	0.0275508	0.0321033	0.0347263	0.357838	0.0177971	0.00933869	0.0248402	0.00884932
pyrogallol	0.000752827	0.00100065	0.00104721	0.00012374	0	0.000221192	0.000473411	0.000378707	0	0	0
retene	0.105651	0.472704	0.204092	0.110939	0.18893	0.105033	0.453148	0.0602162	0.0264092	0.0134607	0.00756801
tricosane	0.000909981	0.00142912	0.000972326	0.000281384	0.000653475	0.000504529	0.00122746	0.000503133	0.000418686	0.000958398	0.000547787
vanillic acid	0.143867	0.206506	0.13261	0.0286941	0.0198287	0.0571126	0.119829	0.0447485	0.0434239	0.0165562	0.00516073
EF is in g/kg fuel.

## Sheet: Particle ERs
	Emission ratios in µg m-3 ppmCO-1
Temperature (K)	295.363	281.8	281.231	279.328	280.328	283.446	288.983	283.634	279.405	294.443	280.511	280.492	280.868	277.786	279.734	285.844	280.52	276.9
Pressure (Pa)	81730.9	81630.2	81563.5	81499	81554.8	81567.9	81609.3	82270.4	82367.8	81905.8	81580.5	81580.7	74993.2	74721.3	74398.1	84542.8	84796.4	85132.9
Fire	Nethker	Nethker	Nethker	Nethker	Nethker	Nethker	Nethker	Nethker	Nethker	Nethker	Nethker	Nethker	Arizona	Arizona	Arizona	204 Cow	204 Cow	204 Cow
(1R,4aS,7S)-7-Ethenyl-1,4a,7-trimethyl-9-oxo-2,3,4,5,6,8,10,10a-octahydrophenanthrene-1-carboxylic acid	0.0458878	0.00785296	0.0139937	0.0103619	0.00697817	0	0	0.00656564	0.00820703	0.0380225	0.00442585	0	0	0.0260827	0	0	0	0.0327373
(2R,3R,4R,5S)-Hexane-1,2,3,4,5,6-hexaol	0.00944152	0	0	0	0	0	0	0	0	0	0	0	0	0	0	0	0	0
(3S,4bS,8R,10aS)-4b,8-Dimethyl-2-(propan-2-yl)-4,4a,4b,5,6,7,8,8a,9,10-decahydro-3H-3,10a-epidioxyphenanthrene-8-carboxylic acid	0.0416688	0.010894	0.0131818	0.0108521	0.00494642	0	0	0	0.00896765	0.0485985	0	0	0.0387213	0.0281433	0	0	0.0148493	0.0483307
1,2,4-Benzenetriol	0.0141458	0.00280381	0.00248743	0.00285323	0	0	0.0179712	0	0	0.00187498	0.02458	0	0	0	0	0	0	0
1-(10-Methylanthracen-9-yl)ethanone	0.0635975	0.0670834	0.0496919	0.0570966	0.0693548	0.0306363	0.0659555	0.0349675	0.0736962	0.234789	0.0273708	0.0197399	0.0356253	0.0246381	0.0366485	0.0172295	0.0259846	0.0577146
1-4,3-6-Dianhydro-alpha-d-glucopyranose	0.331678	0.101424	0.130218	0.164302	0.0955637	0.499606	0.522841	0.104936	0.12033	0	0.0837033	0	0.0576475	0	0	0	0	0.11196
1-Eicosanol	0.0217475	0.0117931	0.0109772	0.0114994	0.00833153	0.0123452	0.0186104	0.0139679	0.0156777	0.0124447	0.0116701	0.0126953	0.0215017	0.0201064	0.0195977	0.00639536	0.00894638	0.00902476
1-Heneicosanol	0.00171266	0	0	0	0	0	0	0	0	0	0	0	0.00324172	0.00332067	0	0	0	0
1-Hexacosanol	0.00855797	0.00352089	0.00356148	0.00265269	0.00216591	0	0	0.00507589	0.00757304	0	0.00282442	0.00354142	0.00607017	0.0146156	0.0125255	0	0.00462676	0.00279015
1-Hexadecanol	0.00363355	0.00197051	0.000976783	0.001421	0.00172982	0.00587298	0.00494016	0.00212459	0.00263115	0.00219345	0.00197378	0.0028165	0.00164996	0	0.00349327	0.00192217	0.00270544	0.00219052
1-Monopalmitin	0.0133789	0	0.010154	0	0	0	0	0	0	0	0	0	0	0	0	0	0	0
1-Naphthalenecarboxylic acid, decahydro-5-(5-hydroxy-3-methylpentyl)-1,4a-dimethyl-6-methylene-, (1R,4aS,5R,8aS)-	0.0488943	0	0	0	0	0	0	0	0	0.0877567	0	0	0	0	0	0	0	0
1-Octadecanol	0.00385907	0.00358356	0.00244518	0.00255762	0.00295787	0	0	0.00245322	0.00481282	0.00321	0.00311393	0.00298404	0.00370373	0.00352854	0.00477836	0	0	0.00379696
1-Tetracosene	0.0153932	0.0109548	0.00857318	0.0114463	0.00714077	0	0	0.0167311	0.0122094	0.0138026	0.00441455	0.00650798	0.0253348	0.0217119	0.00708668	0.00426581	0.00491611	0.0218812
10,18-Bisnorabieta-5,7,9(10),11,13-pentaene	0.106693	0.305686	0.16354	0.191346	0.212535	0.378686	0.725153	0.0847033	0.138779	0.238803	0.0592371	0.0387608	0.0175879	0.0186123	0.0255984	0.0202855	0.0186147	0.164511
10,18-Bisnorabieta-8,11,13-triene	0.0200774	0.0188476	0.0248029	0.0166493	0.0149249	0.00902711	0	0.00661723	0.0181188	0.0702858	0.00715575	0	0	0	0	0	0	0.017117
11-Eicosenoic acid, (Z)-	0.0139858	0	0.00643704	0.00823474	0	0	0	0	0.0135227	0	0	0	0.0128943	0.0116691	0.0183977	0.00744723	0	0.0105015
16-Hydroxyhexadecanoic acid	0.106755	0.0428651	0.051163	0.0924466	0.0343924	0.0270975	0	0.024139	0.0422651	0.0383234	0.0182676	0.0168424	0.0523974	0.0492817	0.0553306	0.0476675	0.02963	0.0362938
2, 4-Dihydroxyacetophenone	0.0774359	0.0192272	0.0409947	0.0395259	0.013373	0.00556376	0.00630205	0.00792371	0.0172947	0.0270509	0.00531294	0.00724238	0.0140408	0.0118144	0.00843228	0.00400641	0.0040805	0.0283707
20-hydroxyeicosanoic acid	0.0355416	0	0.0245036	0.0232697	0.0150349	0	0	0	0.0213026	0.0296739	0	0	0.0210174	0.0373796	0.0424256	0.022137	0	0.0170934
3,4-Dihydroxybenzaldehyde	0.0270389	0	0.00929067	0	0	0	0	0	0.0157925	0.0197926	0	0	0.0109724	0	0	0	0	0.011736
3,4-Dihydroxybenzoic acid	0.0329425	0.0196262	0	0.0218618	0.0148475	0.0168105	0.019237	0.0136439	0.00872069	0.0174596	0.00808666	0.0153036	0.00940915	0.00964961	0.0173827	0.00882909	0.0153895	0.010981
3-(Methylthio)benzoic acid	0.0287246	0.00486464	0.0127089	0.0130931	0.00419989	0	0	0.00249719	0.00830483	0.0216181	0.00233612	0	0	0	0	0	0	0
3-Hydroxy-4-methyl-6H-benzo[c]chromen-6-one	0	0	0	0	0	0	0	0	0	0.0210483	0	0	0.0198581	0.0103878	0.00938398	0	0.00773567	0.0523868
3-Hydroxybenzoic acid	0.00946124	0.00500311	0	0	0	0	0	0	0	0.00354918	0	0	0	0	0	0	0	0
3-Vanilpropanol	0.181436	0.135976	0.113535	0.11767	0.0815955	0.0324208	0.0564798	0.0745768	0.111608	0.174389	0.0198556	0.0324751	0.0475913	0.0513928	0.0344697	0.0210066	0.0304491	0.117802
3-methyl-5-nitrocatechol	0.018569	0.00511503	0.00560243	0.00828713	0.00317095	0	0	0.0137881	0.00849487	0	0.0105267	0.0174371	0.160967	0.0918244	0.0698377	0.00984393	0.0902472	0.0254765
4,4-(Tetrahydrofuran-3,4-diyldimethanediyl)bis(2-methoxyphenol)	0.0459694	0.019406	0.0235582	0.024879	0.0132871	0.00628708	0.0100539	0.0109173	0.0230805	0.0363457	0.00572256	0.00738466	0.0432495	0.0914094	0.0608816	0.0135484	0.0230134	0.0284459
4-Coumaric acid	0.0028352	0.00224381	0.00175819	0.00364392	0	0	0	0	0.00197058	0	0	0	0	0	0	0	0	0.0010992
4-Hydroxybenzoic acid	0.0185988	0.0105206	0.0260173	0.0124215	0.0102962	0.00655846	0	0.00763549	0.0136606	0.00923547	0.00455647	0.00749923	0.0127132	0.0104639	0.00705406	0.00465852	0.00735739	0.0241438
4-methyl-5-nitrocatechol	0.0048198	0.00106145	0.000741532	0.00200208	0	0	0	0.012886	0.00193767	0	0.00606112	0.00853959	0.136112	0.0623974	0.0435088	0.00919864	0.0623634	0.00504159
4-nitrocatechol	0.0280711	0	0.0033476	0	0	0	0	0.0165487	0	0	0.0100078	0.0297545	0.215474	0.18375	0.220918	0.0198658	0.212744	0.0167503
4b,8-Dimethyl-2-isopropylphenanthrene, 4b,5,6,7,8,8a,9,10-octahydro-	0.0100926	0.0508088	0.0437653	0.0559018	0.0600311	0.519844	0.679159	0.02292	0.00930227	0.0100329	0.00972844	0.0324229	0.00551545	0.00668631	0.0196506	0.0152404	0.0236729	0.0157979
5-(hydroxymethyl)furfural	0.512394	0.0821253	0.0929586	0.187656	0.0812073	0.324888	0.420366	0.0893779	0.106622	0	0.101818	0.130206	0	0	0	0	0	0.101493
6,4'-Dimethoxy-7-hydroxyisoflavone	0.0497623	0.0342717	0.0573559	0.0269374	0.018688	0.0110039	0.0109132	0.0180774	0.0331454	0.0385342	0.00789019	0.00911535	0.039449	0.0608976	0.0228791	0.0102574	0.0186991	0.0447713
7-Isopropyl-1,1,4a-trimethyl-1,2,3,4,4a,9,10,10a-octahydrophenanthrene	0.0118407	0.0140128	0.0127305	0.0164288	0.0149859	0.0436135	0.0570219	0.00719498	0.00877697	0	0.00516593	0.00940811	0	0.00493917	0.0110397	0.00590079	0.00486967	0
7-Oxodehydroabietic acid methyl ester	0.170542	0.106788	0.156982	0.100322	0.062517	0.0435888	0.0366838	0.0599619	0.061734	0.261818	0.0321478	0.0356052	0.0730279	0.0533808	0.0272145	0.0132755	0.0229212	0.0979765
7-Oxodehydroabietic acid	0.371226	0.129095	0.217806	0.0875643	0.0492485	0.0476734	0.0406318	0.0592665	0.0916745	0.448936	0.0340664	0.0397962	0.0641142	0.0564176	0.036697	0.0154551	0.027377	0.130496
8-Isopropyl-1,3-dimethylphenanthrene	0.176279	0.35724	0.261746	0.196073	0.35231	0.111036	0.150972	0.115373	0.282915	0.90269	0.0982873	0.0546404	0.0714544	0.0666019	0.0576343	0.0263745	0.0385802	0.26458
9-Ethyl-10-methylanthracene	0.00987163	0.0196031	0.0127113	0.0201525	0.0262057	0.03509	0.0582545	0.0124746	0.00922915	0.0455883	0.00382125	0.00432437	0.00541441	0.00420881	0	0.00647322	0	0.0351433
9-Hydroxynonanoic acid	0.00817207	0.00450441	0.00380565	0.00457994	0.00254065	0	0	0.00311827	0.00554788	0.00572861	0.00274157	0	0.00374204	0.00378364	0	0	0	0.00361283
9-Methylanthracene	0.0144604	0.00830109	0.0122805	0.00921083	0.00509085	0	0	0	0	0	0	0	0	0	0	0.00782804	0.00576306	0.0135449
9-Tetradecenoic acid	0.0501143	0.0099352	0.0368653	0.0202734	0.0192987	0	0	0.00627828	0.0360503	0.0139221	0.00149264	0	0	0	0	0	0	0.0391476
Acenaphthene	0	0.0441004	0.0245616	0	0	0	0	0	0	0	0	0	0	0	0	0	0	0
Acetovanillone	0.0583739	0.0290783	0.0324648	0.0397017	0.0254236	0.155059	0.127019	0.0305283	0.0709489	0.0150552	0.0163946	0.0417777	0.00949405	0.0112662	0.013171	0.0143479	0.0109155	0.0276557
Adonitol	0.0120933	0	0	0	0	0	0	0	0	0	0	0	0	0	0	0	0	0
Benzene, 1,3-dimethoxy-5-[(1E)-2-phenylethenyl]-	0	0	0	0	0	0	0	0	0	0	0	0	0	0	0	0	0	0.0122277
Butanedioic acid	0.0617034	0	0.0180401	0	0	0	0	0	0	0	0	0	0	0	0	0	0	0
C16 acid isomer 1	0.012071	0	0.0158657	0	0	0	0	0	0.0137296	0.00549676	0.0130938	0	0	0.00797972	0.0140575	0.00745271	0	0
Campesterol	0.0547652	0	0.032188	0	0	0	0	0	0.0617986	0.0445612	0	0	0	0	0	0	0	0
Coniferyl alcohol	0.00895734	0.00640777	0.00360628	0.00597308	0.00426812	0	0	0	0	0.00629094	0	0	0	0	0	0	0	0.00241515
Coniferyl aldehyde	0.0944226	0.0486893	0.0557615	0.0632594	0.0154862	0.0218346	0.027882	0.0510245	0.0527884	0.0823251	0.0184127	0.0216731	0.0413796	0.025273	0.0242574	0.0118867	0.0211503	0.0674347
Dehydroabietal	0.148903	0.244325	0.129534	0.134254	0.213132	0.0576554	0.0978165	0.062355	0.193671	0.694479	0.052259	0.020181	0.0362697	0.0268246	0.0302708	0.0137237	0.0277304	0.12476
Dehydroabietic acid	3.84454	3.26939	2.67753	3.03603	2.33362	2.84502	4.77593	2.71238	2.46679	6.15682	1.63196	2.31334	3.2925	2.67564	2.71075	1.40224	1.79242	3.23506
Dehydroabietinol	0.102812	0.0796293	0.104672	0.0606136	0.0533855	0.0521222	0.0457693	0.047545	0.0503356	0.10384	0.0220415	0.0283328	0.0792726	0.0799848	0.0717045	0.02983	0.0336399	0.068264
Deoxy-ribo-hexonic acid 1-4-lactone	0.0186246	0.0174229	0.0208815	0.0204035	0.0183862	0.107516	0	0.00566789	0.0321738	0.0224734	0.00986992	0.0164698	0.0114608	0.0175666	0.00455512	0.00580239	0.00877532	0.0335512
Docosanoic acid, methyl ester	0.0373907	0.0407975	0.0319682	0.037434	0.0290227	0.0309426	0.0281796	0.0375459	0.0415893	0.0390841	0.0270394	0.0258271	0.0818683	0.0906678	0.125492	0.0469024	0.0470961	0.0379628
Docosanoic acid	2.78874	1.13627	0	0.946368	0.758893	0.744287	0.527529	1.09308	1.25546	0.811383	0.769975	0.877707	1.7495	1.89435	2.10002	0.925282	1.24199	1.53849
Docosanol	0.034476	0.0193213	0.0195815	0.0204557	0.0136768	0.012356	0.00947018	0.0177585	0.0234742	0.0196524	0.00981345	0.0106126	0.0344828	0.0610193	0.0470388	0.0219115	0.0225892	0.0239192
Dodecanoic acid	0.0190508	0.00882553	0.00575081	0.00499211	0.0048761	0.0275059	0.0221221	0.0120979	0.00801108	0.00645977	0.00740259	0.0126229	0	0.00512646	0	0.00380168	0.00537294	0.00885688
Eicosanoic acid, methyl ester	0.00965434	0.0124766	0.00807691	0.00969809	0.0117778	0.0071745	0.00933492	0.0084845	0.0152055	0.016994	0.00874752	0.00639973	0.00800933	0.00702969	0.0110177	0	0.0064968	0.00818048
Eicosanoic acid	3.97428	1.06553	1.471	1.05865	0.695841	0.615085	0.692066	1.01911	1.40795	1.26764	0.743243	0.86354	1.64768	1.13257	0.897715	0.450652	0.590903	0.990981
Epiambrettolic acid	0.0368367	0.0256382	0.0317288	0.0288692	0.0179447	0	0	0	0.0201782	0	0	0	0	0	0	0	0	0.0265812
Ferulic acid	0.015965	0	0	0.00604682	0.00415219	0	0	0.0044726	0.0113365	0	0.00488164	0	0	0.00561104	0	0	0	0.00697696
Fluoranthene	0.00540516	0	0	0	0	0	0	0	0	0	0	0	0	0	0	0	0	0
Heneicosanoic acid	0.180042	0.0629708	0.0757794	0.07057	0.0458587	0.0641677	0	0.0623257	0.0750399	0.0637081	0.0417079	0.0718704	0.154771	0.1521	0.118943	0.0519302	0.0669047	0.0828627
Heneicosene	0.00171299	0.00182178	0.00101508	0.00158329	0.00200337	0	0	0	0.00192457	0.00240146	0	0	0	0	0	0	0	0.00196846
Hentriacontane	0.00722647	0.00589592	0.0032918	0.00768131	0	0	0	0.0082292	0.0113627	0	0.00454402	0	0	0	0	0	0	0
Heptacosane	0.00599042	0.00410627	0.00373771	0.00449058	0.00352212	0	0	0.00544211	0.00533899	0.00443053	0.00294481	0.00536511	0.00882056	0.0133347	0.0151825	0	0	0.0027335
Heptadecanoic acid isomer	0.212465	0.278341	0.267624	0.221231	0.19147	0.094159	0.0969631	0.138626	0.233411	0.468056	0.100782	0.0851422	0.06098	0.0276235	0.0403	0.0252859	0.0374842	0.109154
Heptadecanoic acid	0.0591547	0.0414421	0.0308834	0.0375224	0.0329584	0.04456	0.0390326	0.0343173	0.041793	0.0464331	0.0293863	0.0299053	0.0490983	0.0231133	0.0391348	0.019101	0.0273059	0.0382781
Hexacosane	0.00671892	0	0.00558916	0	0	0	0	0	0	0	0	0	0	0	0	0	0	0
Hexacosanoic acid	0.1528	0.0413762	0.0386441	0.0627168	0.0161055	0	0	0.0252348	0.0977433	0.0396834	0.0379931	0	0.09965	0.213601	0.208299	0.030408	0.0552842	0.0484543
Hexadecanoic acid, methyl ester	0.0082423	0.0155838	0.00863344	0.0111062	0.0129978	0.0536189	0.0630986	0.0129186	0.0107207	0.0211303	0.00742843	0.0115974	0	0	0	0	0	0.00667778
Hexadecanoic acid	0.983409	0.897656	0.670714	0.617338	0.592677	1.01209	0.996204	0.765134	0.802009	0.763651	0.683213	0.667826	1.08298	0.455646	0.599596	0.344526	0.387217	0.423883
Hexonic acid, 3-deoxy-, gamma-lactone, 2,5,6-tris-OH	0.0104769	0.00615404	0.00513444	0.0057172	0.0102619	0	0	0.00232765	0	0.00399175	0	0	0.00705443	0.00594263	0.000954512	0	0.00174406	0.00746635
Homovanillic Acid	0.0539928	0.0224478	0.0265276	0.0350199	0.0118603	0.0126439	0.0121404	0.0262418	0.0211124	0.0257797	0.0104851	0.0166845	0.0162996	0.00880866	0.0082343	0.00398366	0.00923251	0.0193449
Isophthalic acid	0.035959	0.00642692	0.00804154	0.00756022	0.00760626	0.00593442	0.0058734	0.00422847	0.0147305	0	0.00206131	0.00395281	0.00629446	0.00439069	0.00503161	0.00772018	0.00621969	0.00994219
Isopimaric acid, methyl ester	0	0.0280493	0.0275678	0.0123931	0.0123941	0.0112686	0.0151604	0.00892857	0	0.0596499	0.0046454	0	0	0	0	0	0	0.0400316
Isopimaric acid	2.04902	1.21906	1.26402	0.999042	0.750823	0.3541	0	0.467976	0.843278	3.08524	0.486736	0.270872	0.446567	0.375526	0.285592	0.0759605	0.214611	1.46129
Juvabione	0.0379544	0.034869	0.0330139	0.0310275	0.0189719	0.0302248	0	0.00968704	0.0186114	0.0281788	0	0	0	0	0	0	0	0
Kaur-16-en-18-ol, (4-alpha)-	0.21247	0.336929	0.258039	0.198784	0.258719	0.0586347	0.0894842	0.119344	0.246978	1.14566	0.0669432	0.0428507	0.0196084	0.0153449	0.0187935	0.0180058	0.034871	0.202512
Levoglucosan	17.0983	5.21332	6.87979	9.41092	3.85805	2.02449	3.0588	3.03843	6.43803	10.9802	2.44211	1.90522	3.72053	2.07075	2.48559	1.31715	2.5724	8.4728
Levopimaric acid	0.0489914	0.0532059	0.0278769	0.0358486	0.056695	0.0493133	0.0785319	0.0215936	0.0505288	0	0.0539438	0.0330846	0.047084	0.0376942	0.0476778	0.0163462	0.0411768	0.0729564
Manool	0.119151	0.0677493	0.0522707	0.0385343	0	0	0	0	0	0	0	0	0	0	0	0	0	0
Matairesinol, (3R-E)-,	0.00949392	0	0.00193016	0.00239311	0.0033136	0	0	0	0.00308936	0.0143294	0	0	0.00372669	0.00456837	0.00772425	0	0	0.00327605
Methyl 3,4-dihydroxybenzoate	0.0161746	0.00866955	0	0.00966964	0.0057537	0	0	0.00636465	0.00777124	0.0071498	0.00271126	0.00347506	0	0	0	0	0	0
Methyl dehydroabietate	0.499147	1.17123	0.837276	0.809678	0.771719	0.863035	1.59307	0.715982	0.679328	1.66453	0.343337	0.382708	0.55441	0.363235	0.305046	0.204298	0.311162	1.20908
Methyl vanillate	0.138434	0.0684878	0.061858	0.0903596	0.0563053	0.188927	0.164028	0.0692083	0.135413	0	0.0394891	0.0646903	0.0104932	0.017007	0.0207091	0.0200711	0.0223886	0.0409658
Naphthalene, 1,2,3,4-tetrahydro-6-(1-phenylethyl)-	0	0	0.0294583	0.0181964	0	0	0	0	0	0.0231476	0	0	0	0	0	0	0	0.0377712
Nonacosane	0.0080709	0.0058169	0.00442888	0.00593929	0.00451991	0	0	0.00870834	0.0112898	0.00335739	0.00524545	0.00638062	0.0047945	0.00955041	0	0.00784855	0.0110177	0.00467433
Nonadecanoic acid	0.133215	0.0874161	0.0988681	0.0759017	0.056763	0.0834197	0	0.0656362	0.0792815	0.173071	0.0505632	0.0597247	0.102393	0.0999932	0.127231	0.0593361	0.0806786	0.087996
Octacosanoic acid	0.0426597	0.0332668	0	0.0306467	0	0	0	0	0.0555077	0	0	0	0.0896958	0.260103	0	0	0.0505677	0.0256269
Octadecanoic acid	0.138437	0.116134	0.0820223	0.0669152	0.0905879	0.155106	0.091277	0.0599688	0.130034	0.117193	0.081048	0.0571461	0.123911	0.0496777	0.118595	0.045846	0.0506941	0.0720298
Octadecenoic acid	0.0504715	0.403906	0.588358	0.0730153	0.0817764	0.0173096	0	0.0477557	0.0891997	0.113254	0.0542627	0.0198088	0.0191462	0.00882017	0	0	0	0.0704554
Palustric Acid	0.631425	0.684673	0.660842	0.464638	0.374794	0.221689	0.273328	0.375542	0.446061	1.65046	0.250223	0.126985	0.288923	0.164935	0.0800434	0.0404853	0.119773	0.78553
Pentacosane	0.00185258	0.00201793	0.00109012	0.00178117	0.00153927	0	0	0.00255369	0.00262529	0	0.00189248	0.00232043	0.00543489	0.0056708	0.00822775	0.00203769	0.00339897	0.00136064
Pentacosanoic acid	0.0348799	0.0253368	0.0189179	0.0209125	0.0145212	0	0	0.0205441	0.0363386	0.0210661	0.0163185	0	0	0.108115	0.0933092	0	0.0251427	0.0193166
Pentadecanoic acid isomer 1	0.0197042	0.0122395	0.00732282	0.00751276	0.00933827	0.012608	0.0245587	0.0122249	0.0157167	0.00907473	0.0123111	0.0222583	0.00667802	0.00533703	0	0.0121488	0.00842303	0.010886
Pentadecanoic acid isomer 2	0.0305355	0.0177743	0.0152025	0.0112798	0.0143612	0.0251342	0	0.0152149	0.0239035	0.0254122	0.0141864	0	0.00966429	0.00761254	0.0098754	0	0.0103121	0.0301509
Pentadecanoic acid	0.067636	0.0304007	0.0257239	0.026999	0.0302284	0.0586143	0.0277173	0.027954	0.0353135	0.0327279	0	0.0224563	0.0302816	0.0265739	0.0293217	0.0160026	0.021924	0.0496924
Phenanthrene, 1,7-dimethyl-	0.0320841	0.0411181	0.0227882	0.0408058	0.0653402	0.14834	0.229809	0.0327091	0.0299333	0.0758534	0.0202642	0.0207653	0.00614175	0.00792014	0.00971459	0.0138713	0.00941238	0.0661793
Phenanthrene, 2,3,5-trimethyl-	0.148761	0.27811	0.185167	0.164636	0.2252	0.17869	0.325488	0.105838	0.176394	0.458136	0.0856331	0.0560105	0.0542053	0.0392214	0.0633885	0.0191357	0.0533108	0.227677
Pyroglutamic acid	0	0	0	0	0	0	0	0	0	0	0	0	0	0	0	0	0	0
Q2-287	0.0991927	0.0308153	0.0490309	0.0385346	0.0205365	0.00884343	0.00438522	0.0104939	0.0472995	0.0634049	0.00545663	0.00720829	0.017657	0.0131912	0.00672532	0	0.00622571	0
Q2-3009	0.16375	0.187015	0.141393	0.116798	0.0965867	0.0777958	0.0908027	0.0899586	0.116082	0.438867	0.0646451	0.0488434	0.0768529	0.0501109	0.0420965	0.0202289	0.0448629	0.14826
Q2-478	0.00852858	0.0221022	0.00916228	0.020775	0.013027	0.0083963	0.00726016	0.0107166	0.0177376	0.0166515	0.00762752	0.00680185	0	0	0	0.00135313	0.00183219	0.00296445
Q2-479	0.10911	0.0410714	0.0645897	0.0971905	0.0340392	0.0142459	0.0194314	0.0186233	0.074194	0.104718	0.0487501	0.0231966	0.00491173	0.00576346	0.0105548	0.00581075	0.0076932	0.02886
Q2-47	0.339631	0.112041	0.122071	0.137335	0.0771831	0.0134853	0.0183106	0.0269447	0.126009	0.217171	0.02618	0.0239679	0.0127701	0.0147082	0.0304396	0.0122361	0.020593	0
Q2-494	0.0270086	0.0151866	0.0141389	0.0171785	0.00761	0.00998804	0.00985402	0.0118637	0.0128802	0.0182494	0.00930159	0.00831686	0.00168406	0.00181566	0.00262099	0.00169038	0.00404348	0.00700486
Q2-499	0.19494	0.390656	0.248998	0.21453	0.12694	0.0678257	0.0610933	0.126938	0.299928	0.269374	0.135505	0.0249883	0.0247659	0.0193598	0.0241639	0.00993885	0.0213134	0.113924
Q2-517	0.476309	0.13156	0.108325	0.182336	0.154979	0.0787146	0	0.0848527	0.112499	0.231463	0.0585985	0.064774	0	0	0	0	0.0729798	0.0403204
Q2-537	0.0428622	0.0134138	0.0252494	0.0233373	0.00881361	0.00571064	0.00958092	0.00530025	0.0151867	0.0259986	0.00482174	0.00718845	0.0056692	0.00526374	0.00804443	0.00311663	0.00415014	0.00954288
Q2-546	0.0375187	0.0137048	0.0205776	0.0234434	0.00954253	0.00791473	0.0127418	0.00628534	0.0163231	0.0254944	0.00389747	0.00773875	0.00464439	0.0039068	0.00519307	0	0.00364464	0.0114223
Q2-551	0.114582	0.168927	0.0356668	0.124822	0.0505977	0.0583524	0.0583204	0.16385	0.0672264	0.383063	0.113876	0.070184	0	0	0	0	0	0
Q2-558	0.107676	0.195058	0.0754542	0.249969	0.0709183	0.0454391	0	0.16734	0.118736	0.689087	0.830603	0.0604109	0	0	0	0	0	0
Q2-560	0.0370742	0	0.0101619	0	0	0	0	0	0	0.0112949	0	0	0.00806887	0.00733016	0.00548393	0	0.00323377	0.0140842
Q2-572	0.0531185	0.0319889	0.019841	0.0223643	0.0240919	0.176209	0.125787	0.0245058	0.0596013	0.116541	0.0309181	0.0302364	0	0.00925215	0.0222455	0.0112464	0.0132396	0.0299692
Q2-593	0.0806436	0	0.0340569	0.012375	0	0	0	0	0.0135445	0.0554168	0	0	0.00862049	0	0	0	0	0
Q2-601	0.00856831	0.00764207	0.0046125	0	0.00681252	0.00599169	0	0.0062026	0.00587789	0.0411793	0.00597651	0.00280286	0	0	0	0	0	0
Q2-608	0.344194	0	0.194335	0.158658	0	0	0	0	0.0461271	0.19469	0	0	0	0.121512	0	0	0	0
Q2-613	0.0200066	0	0	0	0	0	0	0	0	0	0	0	0	0.00673151	0	0	0	0
Q2-618	0.00628159	0	0.000700867	0.000887855	0	0	0	0	0	0.0009893	0	0	0	0	0	0	0	0
Q24-198	0	0	0	0	0	0	0	0	0	0	0.00421979	0.00529304	0.0318502	0.0202046	0.0175406	0.00397375	0.0229123	0
Q33-456	0	0	0	0	0.16079	0.0432683	0.0678418	0	0	0.277524	0	0.024565	0	0	0	0	0	0.144812
Sandaracopimaric acid	0.217638	0.146439	0.150015	0.116322	0.0955498	0.0750786	0.105231	0.0813838	0.114484	0.417203	0.0513891	0.0710003	0.121269	0.10244	0.0719325	0.0470228	0.0775048	0.199381
Sandaracopimarinal	0.131429	0.221881	0.119126	0.136844	0.143991	0.119235	0.228234	0.057477	0.135461	0.750055	0.0376411	0.0275241	0.0248481	0.0226534	0.0201647	0.0142619	0.0254444	0.229587
Shikimic acid	0.0086415	0	0	0	0	0	0	0	0	0	0	0	0	0	0	0	0	0
Stigmasta-3,5-dien-7-one	0.0669632	0.0412575	0.0340217	0.0437568	0.0322169	0.0524229	0	0.0383005	0.0959615	0.0543248	0.0295397	0.0370256	0.0474371	0.0887661	0.0756316	0.0323378	0.0418841	0.0233309
Stigmasta-3,5-diene	0.0267153	0.0294907	0.0318234	0.0412494	0.0239593	0.0115204	0	0	0.0651729	0.0517206	0.0155008	0.0107571	0.0189227	0.0297994	0.0319163	0.0116731	0	0.0153648
Stigmastanol	0.0377214	0.0363326	0.0327876	0	0.0252414	0	0	0	0.0556547	0.0481427	0	0	0	0	0	0	0	0
Suberic acid	0.00419637	0	0.000970605	0.000600941	0.000365579	0	0	0.00110643	0.00097622	0	0	0.00146799	0.00153744	0	0.000958577	0	0	0
Tetracosane	0.00377291	0.00284178	0.00243397	0.00386019	0.00244909	0	0	0.00492219	0.00432988	0.00298208	0.00375423	0.00475256	0.00925703	0.0102324	0.0131159	0.00597672	0.00539854	0.00384757
Tetracosanoic acid, methyl ester	0.0201849	0.0229971	0.0218418	0.0231878	0.0168711	0.0279088	0	0.0240887	0.0218483	0.0359331	0.0213914	0.0285961	0.0764818	0.110328	0.117476	0.0292898	0.0374678	0.0192684
Tetracosanoic acid	0.538245	0.22037	0.245086	0.250164	0.186064	0.225387	0.255989	0.280011	0.401742	0.257498	0.227679	0.319874	0.616445	0.704486	0.82238	0.307506	0.398059	0.219394
Tetracosanol	0.136294	0.0482475	0.053587	0.0523907	0.0342675	0.0382941	0	0.0444051	0.0697948	0.0633259	0.0278846	0.035963	0.126597	0.228697	0.180072	0.0782411	0.07483	0.0675655
Tetradecanoic acid	0.206963	0.0875114	0.117785	0.0870818	0.0489234	0.0283494	0.0200805	0.0509386	0.205663	0.143676	0.0738377	0.0374179	0.0169044	0.0147552	0.0102224	0.012518	0.01837	0.167049
Triacontane	0.00299146	0	0	0	0	0	0	0	0	0	0	0	0	0	0	0	0	0
Triacontanoic acid	0.0228953	0	0.0151372	0	0	0	0	0	0	0	0	0	0	0	0	0	0	0
Tricosanoic acid	0.123911	0.055324	0.0646141	0.0551524	0.0406424	0.0410629	0.0370006	0.0477697	0.0690982	0.0522196	0.0338156	0.0422513	0.0794232	0.106315	0.0850997	0.0343103	0.0469568	0.0510699
Tridecanoic acid	0.0119893	0.00489368	0.00535376	0.00607375	0.0031526	0.00438373	0.00372096	0.00342662	0.00671023	0.00739501	0.0029171	0.00399176	0	0.00342569	0.00400565	0.00179703	0.00248988	0.005679
UNK-1464	0.128141	0.157293	0.1002	0.12127	0.147005	0.0392576	0.0456236	0.0817992	0.150806	0.432615	0.0798474	0.0252984	0.0616997	0.0540033	0	0	0.0450021	0.150117
UNK-2182	0.0483311	0.0381041	0.0416274	0.028265	0.0225718	0.0226652	0.0209548	0.0266785	0.0283961	0.0347633	0.0164172	0.0126408	0.0348166	0.0276492	0.0245405	0.0118138	0.0169551	0.0262868
UNK-2315	0.0394612	0	0	0	0.00671047	0.0405613	0.0675939	0	0.0112292	0.0176504	0	0.0283893	0.0327451	0.0212015	0.0357501	0.0138643	0.0335863	0
UNK-2323	0.0281351	0.0237921	0.0159857	0.0269264	0.0109805	0	0	0.024646	0.0164313	0	0.0195588	0	0	0	0	0	0	0
UNK-3176	0.0152696	0.00324978	0.00381128	0	0	0	0	0.00166635	0	0.00671326	0	0	0.00250465	0	0	0	0	0
UNK-3423	0.657815	0.263927	0.339395	0.413265	0.18958	0.108983	0.238188	0.14444	0.30283	0.368291	0.0909563	0.153514	0.222519	0	0.124758	0	0	0.431807
UNK-3425	0.248376	0.033863	0.169324	0	0.0123516	0	0.00747724	0.0163148	0.129463	0.0542719	0.00865235	0	0.100442	0.0253707	0.00744492	0.00419734	0.0050501	0.225559
UNK-3427	1.73912	0.436452	0.812398	0.802997	0.277918	0	0.0281476	0	0.538502	1.26134	0	0	0	0	0	0	0	0
UNK-3440	0.036263	0.0113559	0.0711933	0.020242	0.00871672	0	0	0.00338048	0.0136444	0.0115959	0.00247793	0.00436244	0.0428639	0.0267602	0.013419	0.00773017	0.00843997	0.161672
UNK-3468	0.0183478	0.01057	0.00405085	0.00908814	0.0067179	0.173333	0.256016	0.0153207	0.0181291	0	0.00657426	0.0205863	0.00417576	0.0110831	0.0590676	0.0809468	0.0554876	0.0056279
UNK-3471	0.0251788	0.00677091	0.0101857	0.0134939	0.00545124	0	0	0.00268971	0.00782543	0.0219741	0.00187682	0.0018736	0.00496615	0.00465628	0.00373622	0.00203798	0.00275717	0.0102332
UNK-3636	0.0225355	0.0138115	0.0170608	0.0142755	0.00989814	0	0	0.0144763	0.0265579	0.029962	0.00788737	0.0109538	0.0179765	0.0359868	0	0.0124879	0	0.012855
UNK-3661	0.0156101	0.00645494	0.0105399	0.00650992	0.00395887	0	0	0.00423148	0.00522621	0.0193809	0.00348969	0	0	0.00822356	0	0	0	0.0099776
UNK-3669	0.0507848	0	0	0	0	0.0118312	0.0175035	0	0	0.234835	0	0	0.0145757	0.0101588	0	0	0.0128142	0.0795765
UNK-3708	0.0756888	0.105385	0.0688726	0.0681571	0.100696	0.039173	0.0578744	0.0486423	0.119427	0.30908	0.0544221	0.0290982	0.0295682	0.0212421	0.0325616	0.0220319	0.0359277	0.0672228
UNK-3730	0.0857239	0.0873231	0.0915797	0.0771431	0.0516034	0.0373994	0.0380533	0.0442145	0.0519812	0.2148	0.0270329	0.027829	0.0536286	0.0406624	0.0251753	0.01074	0.0172318	0.0840121
UNK-3784	0.00789328	0.00250735	0.00504881	0.012648	0.00167606	0	0	0	0	0.0472191	0	0	0	0	0	0	0	0.00358951
UNK-3834	0.0356347	0.00879314	0.0130123	0.00930457	0.00647345	0.01403	0.0246399	0.00799546	0.0149045	0.0259737	0.0051798	0.0106144	0.0251287	0.0205863	0.0145478	0.00809286	0.01346	0.0123046
UNK-3841	0.0647187	0.016019	0.020445	0.0306135	0.0100058	0.00385557	0.00631429	0.00821724	0.0187314	0.0577211	0.006791	0.00898872	0.00432141	0.0035039	0	0.00274714	0.00363812	0.00661876
UNK-3858	0.220948	0.183028	0.106896	0.137408	0.0838505	0.111903	0.0971692	0.138969	0.0981124	0.151498	0.136925	0.0737066	0.0367598	0.0347617	0.0395481	0.0180927	0.044499	0.047804
UNK-3860	0.137805	0.0586844	0.0588372	0.0464658	0.0313762	0.0859326	0.0771321	0.0676843	0.0531718	0.0419981	0.0369967	0.0437521	0.051481	0.0368744	0	0	0.0449577	0.0651166
UNK-386	0.0209084	0.0158404	0.015982	0.0167877	0.0100252	0.0107249	0	0.0105126	0.0300528	0.0275063	0.00875414	0.0105994	0.0117541	0.026535	0	0	0	0.00964691
UNK-3871	0.0887231	0.132741	0.0859651	0.07157	0.107829	0.0492213	0.0277592	0.0500638	0.125919	0.310017	0.0579296	0.032319	0.0175688	0.011661	0.0208373	0.00971032	0.0168011	0.0750789
UNK-3885	0.179083	0.0282332	0.114977	0.0622209	0.0325615	0.0161184	0.0198239	0.0173879	0.0360272	0.0691376	0.00848478	0.0140269	0.0890139	0.0778098	0.0407937	0.0183206	0.0193565	0.0671745
UNK-3914	0.0156853	0.0128602	0.00965885	0.0114983	0.0107918	0	0	0.011458	0.010499	0.0230914	0.00682626	0.00606681	0.00899044	0.00690695	0.010381	0	0.00890242	0.00932163
UNK-3925	0.0630424	0.0312363	0.0418852	0.0355056	0.0205211	0	0	0.0205713	0.0275595	0.0644495	0.0111856	0	0.0405037	0.0514849	0.0337684	0	0.022372	0.0356984
UNK-3929	0.018607	0	0.00182341	0.00371524	0	0	0	0.00816556	0.00600116	0	0.00257733	0	0.040846	0.0229691	0.0197898	0.00641255	0.0172615	0.0137673
UNK-3931	0.00784857	0	0.00191495	0.00123162	0.000569643	0	0	0.00127853	0.00111797	0.00101648	0	0	0.00373657	0.00219767	0.00139823	0	0	0.00361678
UNK-3940	0.0240187	0.00515819	0.00885454	0.0121847	0.00328561	0	0	0.00310229	0.00581532	0.0188114	0.00240671	0	0.00322424	0	0	0	0	0.00535239
UNK-3942	0.179024	0.0709164	0.103116	0.07433	0.0589147	0	0.0858804	0.0549399	0.088363	0.226279	0.0386538	0	0.0857642	0.0834755	0.0928422	0.0538942	0.0530654	0.0830876
UNK-3959	0.156221	0.12311	0.117946	0	0.0808718	0.081055	0.061779	0.100472	0.0969581	0.244762	0.0679527	0.0613804	0.088749	0.0633387	0.0744172	0.0201629	0.0493721	0.110689
UNK-3970	0.183645	0.0606176	0.0934553	0.11838	0.0330667	0.0329912	0.0402584	0.0331036	0.0579156	0.204573	0.0211071	0.03589	0.0274105	0.0232458	0.0372359	0.0210107	0.0363017	0.0552252
UNK-3976	0.0984046	0.144087	0.128239	0.0793779	0.088726	0.0555955	0.0290605	0.0629627	0.0805903	0.293026	0.0467537	0.0229118	0.0146409	0.0106852	0	0	0	0.0974125
UNK-3989	0.0441715	0.0158686	0.0209366	0.0257711	0.0121326	0.0222395	0.0181072	0.0103446	0.0288767	0.0217552	0.00832322	0.00951395	0	0	0	0	0	0.024067
UNK-4001	0	0.0955697	0.092525	0.0554218	0	0	0	0	0.0352679	0.131324	0	0	0	0	0	0	0	0.0151631
UNK-4002	0.00682501	0.00226332	0.00251079	0.00334667	0.00112523	0.00465195	0.00379849	0.00394929	0.00329486	0.00473041	0.00219159	0.00443466	0	0	0	0	0	0.00222595
UNK-4015	0.0399192	0	0	0	0.0149002	0	0	0	0	0.0607975	0	0	0	0	0	0	0	0
UNK-4020	0.00884127	0.0057649	0.00444232	0.00574636	0.00412347	0	0	0.00254391	0.00387793	0.00713161	0.00182787	0	0.00464819	0.00591618	0	0.00450779	0.00645839	0.00625693
UNK-4023	0.00596314	0	0.00487193	0	0	0	0	0	0.00389191	0.0058771	0	0	0.00477758	0.00390995	0.00621677	0	0.00569058	0
UNK-4032	0.0107492	0.0375619	0.0349964	0.0384159	0.0410909	0.12326	0.122308	0.0169383	0.0113373	0.0104339	0.00970215	0.018058	0.00443263	0.00401136	0	0.00939225	0.00763341	0.0205917
UNK-4033	0.0943288	0.102098	0.0724456	0.0529288	0.0589314	0	0	0.0351908	0.0903962	0.197619	0.0411065	0.0198397	0	0.0223706	0	0.010014	0.0209326	0
UNK-4039	0.0175086	0.00336414	0.00513329	0.00521539	0.00217946	0	0	0	0.00318245	0	0	0	0.00443634	0.0050214	0	0	0	0.00823555
UNK-4040	0.030424	0.0166484	0.0211251	0.0177957	0.0101128	0.0100618	0.00985281	0.0093137	0.0106713	0.0455097	0.00591913	0.00761817	0.0127847	0.0096319	0.00864131	0.00463876	0.00622486	0.0218787
UNK-4045	0.0290832	0.0146592	0.0150409	0.0182405	0.0151159	0.0145352	0.0170663	0.00898555	0.0108624	0.0183502	0.00547298	0.00712504	0.0159049	0.00914431	0.0144344	0.00790087	0.00995487	0.0144919
UNK-4047	0.0808939	0.269053	0.178694	0.0946664	0.148157	0.0294941	0.0174339	0.0485167	0.120881	0.486996	0.0431009	0.0154954	0.0213539	0.0103111	0	0	0.00927878	0.180108
UNK-4048	0.00597373	0.0288774	0.0197343	0.0287971	0.013064	0.0501121	0.0297591	0.0207674	0.0137879	0.0071765	0.0214431	0.0122544	0.00175852	0	0.00415499	0.00606067	0	0.0099832
UNK-4054	0.0232772	0.00508464	0.00892302	0.0105134	0.00362978	0	0.00530787	0.00236274	0.00577378	0.00901101	0	0	0.00664115	0.00481528	0.00498505	0.00304684	0.00356036	0.00844443
UNK-4059	0.0245854	0.00157349	0	0	0	0	0	0	0.00795225	0.0123612	0	0	0.00726595	0.00593136	0.00501759	0.00307619	0.00364567	0.0139417
UNK-4075	0.0364212	0.0232266	0.0252855	0.0162142	0.00964089	0.0247168	0	0.0165505	0.0138638	0.00660687	0.0124154	0	0.0129841	0	0	0	0	0.0170604
UNK-4080	0.243524	0.111791	0.200943	0.144651	0.0344678	0.0449899	0	0.0761409	0.104396	0.191528	0.0388436	0.044782	0.166791	0.177324	0.122774	0.0424164	0.0536494	0.118737
UNK-4081	0.0610239	0.0141589	0.017113	0.0243861	0.0130594	0.0117992	0.0197356	0.00841653	0.0185068	0.0287147	0.00580285	0.00986306	0.00991126	0.00906439	0.00989022	0.0104619	0.00841085	0.0162523
UNK-4083	0.414304	0.0898441	0.145922	0.0936631	0.0751102	0.0576661	0.027664	0.048547	0.102747	0.184517	0.0326364	0.0387963	0.166359	0.0986606	0.0550987	0.0221526	0.0342068	0.18659
UNK-4088	0.0217047	0	0.00261242	0.00305912	0	0	0	0	0	0	0	0	0	0	0	0	0	0.00163388
UNK-4089	0.0502846	0.071968	0.0600224	0.0422425	0.0616457	0.019176	0.0232172	0.0264943	0.0543037	0.19681	0.0252829	0.0143916	0.0130214	0.0101417	0.0115621	0.0103536	0.0179856	0.087256
UNK-4094	0.049149	0.0169253	0.0292195	0.0202436	0.00434632	0	0	0	0.015566	0.0250985	0	0.00526959	0	0.00269401	0	0	0.00484336	0.0266038
UNK-4098	0.0524828	0.00855719	0.00759944	0.0102207	0.00490168	0	0.00962644	0.00986026	0.00636698	0.0181154	0.00225204	0	0.0271633	0.0174944	0.0171667	0.00898813	0.0150446	0.00854612
UNK-4100	0.135908	0.0589699	0.13011	0.0917919	0.0520159	0.0152102	0.0181324	0.029555	0.036776	0.33354	0.016176	0.0193961	0.0386097	0.0287356	0.0178163	0.0135151	0.0122748	0.124505
UNK-4105	0.238946	0.0942099	0.0903165	0.113392	0.137243	0.384717	0.311683	0.176362	0.164626	0.151965	0.0428291	0.117118	0.060323	0.0378483	0.05561	0.0553106	0.0389906	0.110315
UNK-4107	0.0359161	0.22474	0.155561	0.206053	0.229828	1.32333	1.63819	0.113651	0.0658657	0.0371984	0.0722797	0.105082	0.013622	0.0112144	0.0375931	0.0369857	0.0446789	0.0750411
UNK-4108	0.701944	0.0200155	0.262961	0.257245	0.151709	0	0.0294909	0.273924	0.209448	0.225172	0.15105	0.236875	0	0	0	0	0	0
UNK-4109	2.05578	0.433606	1.02917	1.02456	0.379934	0.058591	0.0667926	0.154174	0.664663	1.14757	0.158617	0.114161	0.07173	0.0652056	0.112564	0.0570305	0.0992481	0.430098
UNK-4113	0.69691	0.223022	0.133263	0.228858	0.136991	0.0618996	0.0722188	0.111076	0.165591	0.121089	0.106352	0.0632469	0.306284	0.139421	0.126002	0.0751469	0.201974	0.185748
UNK-4115	0.279121	0.0455027	0.0935967	0.091211	0.0317301	0.017729	0.0214864	0.0267136	0.0729216	0.166278	0.0188178	0.0237601	0.0367536	0.0256405	0.0240013	0.0156411	0.0126385	0.0611305
UNK-4117	0.311554	0.0586132	0.165102	0.130627	0.0478331	0.0194371	0.0242552	0.0209458	0.0768473	0.095407	0.0155856	0.0207975	0.0668966	0.0457038	0.0322729	0.0216857	0.0199188	0.150427
UNK-4119	0.274822	0	0	0.0536117	0	0	0	0	0	0	0	0	0.057499	0.0168468	0	0	0	0
UNK-4126	0.156096	0.0191899	0.0548975	0.0414731	0.0141643	0	0	0	0.0424802	0	0.00475163	0.0146918	0.0150292	0.0129564	0.0113643	0.00350401	0	0.106586
UNK-4128	0.243144	0.0518507	0.149891	0.0723972	0.025016	0.00883485	0.0116101	0.0217305	0.0703879	0.0452063	0.0103362	0.00771094	0.0896231	0.0436123	0.0107134	0.00548717	0.00725209	0.221339
UNK-446	0.0185568	0.0223827	0.0141376	0.0185428	0.0217699	0.0906611	0.0670624	0.012759	0.0178678	0.00978748	0.0128479	0.0131271	0	0	0	0	0	0.00649997
UNK-821	0.0146048	0.00206984	0.0022899	0	0	0	0	0	0	0.00516535	0	0	0.00254529	0	0	0	0	0.00248794
UNK-888	0.00926028	0.00701475	0.0047381	0.00563414	0.00678961	0	0.00668414	0.00708111	0.00700811	0.0151697	0.00408624	0.00432725	0.00436467	0.00421807	0.00917876	0.00429198	0.00620514	0.00553535
UNK-909	0.0112986	0.0105337	0.011247	0.0115647	0.0088887	0.00734891	0	0.00982164	0.00957799	0.0278917	0.00775996	0.00822059	0.00718267	0.00601083	0	0	0	0.0056072
UNK-AHG-HZ-SOAZ-157	0.0315071	0	0	0	0	0	0.0031703	0	0	0.000433085	0	0	0.012236	0	0.00686881	0	0	0
UNK-AHG-LY-AMZ-140	0	0	0.00503783	0.005027	0.00270946	0	0	0.00233899	0	0	0.00263494	0	0.0357218	0.0110213	0.00680655	0.00517405	0.00652242	0.0174437
Undecanedioic acid	0.0221701	0.0131397	0.0148208	0.0142923	0.0120077	0	0	0.00549498	0.0182347	0.0138443	0.00820214	0	0.00635279	0.00511504	0.00842534	0.00661423	0.00763295	0.015408
Vanillin	0.290379	0.169769	0.070022	0.157274	0.139069	0.95961	0.911719	0.204608	0.210809	0.0400792	0.111772	0.274386	0.0427483	0.0649663	0.156672	0.0977764	0.153651	0.0744012
Vanillyl glycol	0.00739045	0.00292949	0.00227776	0.00272677	0.00239376	0	0	0	0.00316404	0.00389452	0	0	0.00626109	0.00522488	0.00642192	0.00296064	0.00462657	0.00729906
Veratric acid	0.0209627	0.00790419	0.0114139	0.0131471	0.00409647	0	0	0.00935464	0.00659837	0	0.00387314	0.00620064	0.00608226	0.00334543	0.00266843	0	0.00222469	0.00557383
abietic acid	0	0.320761	0.525838	0.348501	0.461805	0.0399665	0.0387465	0.0968658	0.110934	0.831328	0.0287863	0.025236	0.0730896	0.0516338	0.048555	0.0332145	0.0316669	0.663457
acetosyringone	0	0	0	0	0	0	0	0	0	0	0	0	0.00603743	0.00315433	0.00247393	0	0	0
azelaic acid	0.0363265	0.00592034	0.00571111	0.00807723	0.00297251	0.00595729	0.0057898	0.00781568	0.00775697	0.0079026	0.00388073	0.00646182	0.00932205	0.00598436	0.00724806	0.00244896	0.00629219	0.00568589
beta-sitosterol	0.194561	0.149624	0.137809	0.133772	0.0881834	0.0865082	0.0890241	0.0880587	0.225086	0.163257	0.0659541	0.0635073	0.150721	0.267355	0.211541	0.092473	0.0774266	0.0937545
bornyl acetate	0	0	0	0	0	0	0	0	0	0	0	0	0	0	0.747004	0.971325	0	0
didehydroabietic acid	2.04284	1.47256	1.33378	1.59349	0.920338	0.716503	0.583138	1.01531	1.19386	3.08617	0.654284	0.634307	0.777226	0.540425	0.538438	0.270932	0.419375	1.00478
divanillyl	0.11959	0.064885	0.0810041	0.0733911	0.0460277	0.0301685	0.0708103	0.0436905	0.0411886	0.135357	0.0213291	0.0289169	0.0980842	0.113176	0.0570338	0.0237599	0.0446862	0.0905217
eicosane	0.00206668	0.00377948	0.00208655	0.00286609	0.00378326	0.0114599	0.0213071	0.00327722	0.00316192	0.00284973	0	0.00490293	0	0	0.00489283	0.00356612	0	0.00203286
galactosan	0.0574106	0.0248684	0.0244265	0.0346816	0.0164026	0.0139684	0.0237752	0.0121519	0.0295653	0.0299245	0.00780048	0.0154751	0.00671603	0.00736426	0.00786227	0.00806331	0.00547115	0.0101719
gamma-Sitostenone	0.0356209	0	0	0	0	0	0	0	0	0.0281621	0	0	0	0	0	0	0	0
henicosane	0.00474815	0.00544706	0.00408968	0.0047365	0.00503982	0.00517074	0.00806562	0.00370488	0.0061605	0.00907201	0.0032871	0.00444776	0.00194456	0.0013699	0.00347402	0.00239579	0	0.00716859
hydroquinone	0.00285918	0.00269894	0.00490412	0.00312686	0.000949562	0	0	0	0	0	0	0	0	0	0	0	0	0
isopimaral	0.41024	0.34529	0.268064	0.206171	0.199942	0.240315	0.245384	0.154437	0.211757	0.834227	0.0895709	0.0447343	0.115805	0.0515664	0.0390475	0.0313193	0.0497209	0.522761
isopimaric acid isomer	0.148356	0.196006	0.233721	0.12564	0.113996	0.0753493	0.0978404	0.0944086	0.120573	0.564433	0.0600799	0.0562827	0.0950043	0.0586536	0.047914	0.0253881	0.0512416	0.268769
linoleic acid	0.0550108	0.231073	0.150528	0.13966	0.10034	0	0	0.0835202	0.14898	0.265977	0.0941353	0	0.0423894	0	0	0	0	0.107723
mannosan	0.195328	0.118983	0.122021	0.150956	0.0707726	0.0701677	0.145216	0.0469155	0	0.102894	0.0311005	0.071042	0.0536662	0.0528905	0.0496621	0.0525369	0.037285	0.0820956
nonacosan-10-ol	0.0740205	0.0575868	0.0593527	0.0546067	0.0393564	0.0450688	0.0456061	0.0456907	0.0698508	0.0224648	0.0206367	0.037921	0.145249	0.212512	0.157761	0.0521947	0.0624535	0.0524152
pimaric acid	0.865773	0.703478	0.712145	0.530254	0.451437	0.241257	0.359555	0.365442	0.48869	2.42106	0.211713	0.151832	0.3836	0.23115	0.170101	0.0961925	0.198308	0.928458
pyrogallol	0.00642241	0.00424511	0.00534145	0.00399994	0.00202756	0	0	0	0.00311275	0.003203	0.00450506	0	0	0	0	0	0	0.00361381
retene	0.90131	2.00538	1.041	1.11801	1.81781	1.23027	2.116	0.783827	1.47809	3.0659	0.716326	0.429369	0.20787	0.197682	0.239666	0.132197	0.220805	1.32336
tricosane	0.00776309	0.00606285	0.0049595	0.00586783	0.00461066	0.0065316	0.00731888	0.00728714	0.00710003	0.00830471	0.00598523	0.00680714	0.0148003	0.0143086	0.014713	0.00526044	0.0071727	0.00774559
vanillic acid	1.22733	0.876071	0.6764	1.14705	0.470171	0.456799	0.22208	1.25029	0.803723	0.810742	0.532324	0.706	0.255673	0.134802	0.0988315	0.0435199	0.108514	0.433977

## Sheet: Gas EFs
				Emission factors in g/kg
			MCE	0.9	0.91	0.88
Compound	MW	Functional Group	Formula	Nethker	Arizona	Arizona
Acrolein	56	Aldehyde	C3H4O	0	0.0297834	0.0111917
Acetonitrile	41	Nitrile	C2H3N	0.00104811	0.00758471	0.00368699
Acetone	58	Ketone	C3H6O
Furan	68	Furan	C4H4O	0.004914	0.0534834	0.0245905
Acetic acid, methyl ester	74	Ester or Ether	C3H6O2	0.00347093	0.044168	0.0190263
Methacrolein	70	Aldehyde	C4H6O	0.0193688	0.038136	0.0190438
Methyl vinyl ketone	70	Ketone	C4H6O	0.0308534	0.0616765	0.0358521
2,3-Butanedione	86	Ketone	C4H6O2	0.0280658	0.0686013	0.0348381
2-Butanone	72	Ketone	C4H8O	0.0851708	0.112154	0.071692
Furan, 2-methyl-	82	Furan	C5H6O	0.22127	0.408298	0.287859
1,3-Butadiene, 2,3-dimethyl-	82	Alkene	C6H10
Cyclohexene	84	Alkene	C6H10
Pentanal	86	Aldehyde	C5H10O	0.0142507	0.0218378	0.0138093
Furan, 2,5-dimethyl-	96	Furan	C6H8O	0.0306065	0.0310204	0.00524215
Pyrazine	80	Heterocyclic	C4H4N2	0.0029755	0.00568326	0.00106138
N-Methylpyrrole	81	Heterocyclic	C5H7N	0.00109261	0.00855325	0.00337932
Pyridine	79	Heterocyclic	C5H5N	0.0598634	0.0477271	0
Pyrrole	67	Heterocyclic	C4H5N	0	0	0
Pentanedione	100	Ketone	C5H8O2	0	0	0
Furfural	96	Furfural	C5H4O2	0.99374	0.618339	0.646664
Phenylacetylene	102	Alkene	C8H6	0	0.00108908	0
Cyclohexanone	98	Ketone	C6H10O	0.00364348	0.0109845	0.00545502
Styrene	104	Alkene	C8H8	0.0158889	0.0394787	0.0225257
Anisole	108	Ester or Ether	C7H8O	0.00110016	0.00443526	0.00197612
alpha-Pinene	136	Monoterpene	C10H16	0.356655	0.13649	0.153332
Camphene	136	Monoterpene	C10H16	0.299842	0.10648	0.085331
5-Methyl furfural	110	Furan	C6H6O2	0.0686427	0.0690762	0.00553353
Sabinene	136	Monoterpene	C10H16	0.0282774	0.0334867	0.0249565
beta-Pinene	136	Monoterpene	C10H16	0.235616	0.0599228	0.047862
Benzonitrile	103	Nitrile	C7H5N	0.0194903	0.0215632	0.0153515
alpha-Methylstyrene	118	Alkene	C9H10	0.00185811	0.00292447	0.00149962
beta-Myrcene	136	Monoterpene	C10H16	0.0617715	0.0164548	0.00683872
alpha-Phellandrene	136	Monoterpene	C10H16	0.047706	0	0.00124853
3-Carene	136	Monoterpene	C10H16	0.249647	0.143397	0.14803
alpha-Terpinene	136	Monoterpene	C10H16	0.0205006	0.00111468	0
Limonene	136	Monoterpene	C10H16	0.219454	0.107046	0.0667851
Eucalyptol	154	Oxygnated Terpene	C10H18O	0	0	0
beta-Phellandrene	136	Monoterpene	C10H16	0.243084	0.0135298	0.00829028
trans-beta-Ocimene	136	Monoterpene	C10H16	0	0	0
cis-beta-Ocimene	136	Monoterpene	C10H16	0.00102426	0.000547332	0
Salicylaldehyde	122	Phenolic	C7H6O2	0	0.0310332	0
Indene	116	PAH	C9H8	0.00188824	0.00533417	0.00195119
gamma-Terpinene	136	Monoterpene	C10H16	0.0137819	0.00623229	0.00457188
Acetophenone	120	Ketone	C8H8O	0.0074755	0.00822963	0.00302675
Terpinolene	136	Monoterpene	C10H16	0.0268163	0.00616918	0.00265723
Guaiacol	124	Phenolic	C7H8O2
Phenol, 2,6-dimethyl-	122	Phenolic	C8H10O	0	0	0
Benzaldehyde	106	Aldehyde	C7H6O	0	0	0
Phenol, 2,5-dimethyl-	122	Phenolic	C8H10O	0	0	0
Phenol, 2,4-dimethyl-	122	Phenolic	C8H10O	0	0	0
Camphor	152	Oxygnated Terpene	C10H16O	0.0106793	0.00581463	0.00429625
Phenol, 3,5-dimethyl-	122	Phenolic	C8H10O	0	0	0
Phenol, 2,3-dimethyl-	122	Phenolic	C8H10O	0	0	0
1-Dodecene	168	Alkene	C12H24	0.00300531	0.00978432	0.00456341
Creosol	138	Phenolic	C8H10O2	0.153604	0.135858	0.103562
Naphthalene	128	PAH	C10H8	0.00889364	0.0301825	0.0215838
Phenol, 2,4,6-trimethyl-	136	Phenolic	C9H12O	0	0	0
Guaiacol, 4-ethyl	152	Phenolic	C9H12O2	0	0.0286262	0
Bornyl acetate	196	Oxygnated Terpene	C12H12O2	0.00696724	0.00200581	0.00162518
Indole	117	Heterocyclic	C8H7N	0	0	0
Naphthalene, 2-methyl-	142	PAH	C11H10	0.00123746	0.00541351	0.00415263
Naphthalene, 1-methyl-	142	PAH	C11H10	0.00138451	0.00318715	0.00260506
Eugenol	164	Oxygnated Terpene	C10H12O2	0	0	0
1,13-Tetradecadiene	194	Alkene	C14H26	0	0	0
1-Tetradecene	196	Alkene	C14H28	0.00147729	0.00215982	0.00115533
Naphthalene, 2-ethyl-	156	PAH	C12H12	0	0.000450028	0
Longifolene	204	Sesquiterpene	C15H24	0.00181468	0.0653845	0.0397196
Naphthalene, 1-ethyl-	156	PAH	C12H12	0	0	0
Naphthalene, 2,6-dimethyl-	156	PAH	C12H12	0	0.00037856	0
iso-Eugenol	164	Oxygnated Terpene	C10H12O2	0	0	0
Acenaphthylene	152	PAH	C12H8	0	0.000266451	0
Acenaphthene	154	PAH	C12H10	0	0	0

## Sheet: Gas ERs
				Emission ratios in ppb ppmCO-1
Compound	MW	Functional Group	Formula	Nethker	Nethker	Arizona	Arizona	Arizona	204 Cow	204 Cow	204 Cow
Acrolein	56	Aldehyde	C3H4O	0.170305	0	0.252632	0.159158	0.2746	0	0	0.0324752
Acetonitrile	41	Nitrile	C2H3N	0.209778	0.0116688	0.0878734	0.0716157	0	0	0	0.0541938
Acetone	58	Ketone	C3H6O
Furan	68	Furan	C4H4O	0.665318	0.032986	0.373605	0.287991	0.182303	0	0	0.168095
Acetic acid, methyl ester	74	Ester or Ether	C3H6O2	0.314736	0.0214101	0.283516	0.204759	0.148455	0.159486	0.156302	0.125025
Methacrolein	70	Aldehyde	C4H6O	0.183299	0.126302	0.258785	0.216658	0.169912	0.0523254	0.103657	0.122985
Methyl vinyl ketone	70	Ketone	C4H6O	0.22258	0.201191	0.418528	0.407884	0.376908	0.156595	0.323582	0.210784
2,3-Butanedione	86	Ketone	C4H6O2	0.398618	0.148965	0.37891	0.322609	0.365748	0.219959	0.725105	0.306606
2-Butanone	72	Ketone	C4H8O	0.499625	0.539961	0.739917	0.792973	0.674544	0.103261	0.411312	0.365563
Furan, 2-methyl-	82	Furan	C5H6O	1.33603	1.23172	2.36519	2.79567	2.85149	1.4856	2.29535	1.23453
1,3-Butadiene, 2,3-dimethyl-	82	Alkene	C6H10
Cyclohexene	84	Alkene	C6H10
Pentanal	86	Aldehyde	C5H10O	0.0558911	0.0756385	0.120618	0.127877	0.216455	0	0	0.0187269
Furan, 2,5-dimethyl-	96	Furan	C6H8O	0.176703	0.145528	0.153489	0.0434869	0.00521172	0.109892	0.0149102	0.198043
Pyrazine	80	Heterocyclic	C4H4N2	0.0140621	0.0169775	0.033745	0.0105658	0	0	0	0.00298733
N-Methylpyrrole	81	Heterocyclic	C5H7N	0.00712101	0.00615721	0.050159	0.0332249	0.0131187	0	0	0.013731
Pyridine	79	Heterocyclic	C5H5N	0.255274	0.34589	0.286972	0	0	0	0	0.150478
Pyrrole	67	Heterocyclic	C4H5N	0	0	0	0	0	0	0	0
Pentanedione	100	Ketone	C5H8O2	0	0	0	0	0	0	0
Furfural	96	Furfural	C5H4O2	3.63722	4.72504	3.05955	5.36448	1.38413	0	4.15518	1.36024
Phenylacetylene	102	Alkene	C8H6	0	0	0.00507178	0	0	0	0.00705717	0.00623944
Cyclohexanone	98	Ketone	C6H10O	0.019447	0.0169705	0.0532422	0.0443292	0	0	0.0152196	0.0210904
Styrene	104	Alkene	C8H8	0.0781697	0.069737	0.180315	0.172491	0.147613	0.0980768	0.118779	0.109641
Anisole	108	Ester or Ether	C7H8O	0.00683139	0.00464982	0.0195073	0.0145717	0.0185439	0	0.00382723	0.00931424
alpha-Pinene	136	Monoterpene	C10H16	0.463405	1.19705	0.476721	0.89787	1.77295	0.619102	0.497594	0.128892
Camphene	136	Monoterpene	C10H16	0.619153	1.00637	0.371903	0.499676	0.782475	0.440034	0.255549	0.12984
5-Methyl furfural	110	Furan	C6H6O2	0.33641	0.284843	0.298289	0.0400617	0.169082	0.0271813	0.113197	0.357307
Sabinene	136	Monoterpene	C10H16	0.053162	0.0949084	0.11696	0.146138	0.242423	0.0272551	0.0143413	0.00613671
beta-Pinene	136	Monoterpene	C10H16	0.51599	0.790807	0.209293	0.280267	0.395396	0.602976	0.40951	0.079173
Benzonitrile	103	Nitrile	C7H5N	0.0566481	0.0863745	0.0994438	0.118695	0.0659517	0	0.0559386	0.0913871
alpha-Methylstyrene	118	Alkene	C9H10	0.00820419	0.00718775	0.0117725	0.0101209	0.0134538	0	0.0141132	0.0137316
beta-Myrcene	136	Monoterpene	C10H16	0.0957258	0.207326	0.0574721	0.0400457	0.0320501	0.122959	0.0196798	0.0919116
alpha-Phellandrene	136	Monoterpene	C10H16	0.0782138	0.160117	0	0.00731107	0	0	0	0.0156509
3-Carene	136	Monoterpene	C10H16	0.486168	0.837899	0.500845	0.866821	1.44541	1.51954	0.857588	0.489855
alpha-Terpinene	136	Monoterpene	C10H16	0.0715743	0.0688068	0.00389327	0	0	0	0	0.00203328
Limonene	136	Monoterpene	C10H16	0.454028	0.73656	0.373882	0.391075	0.507095	0.252385	0.0862018	0.165514
Eucalyptol	154	Oxygnated Terpene	C10H18O	0	0	0	0	0	0	0	0
beta-Phellandrene	136	Monoterpene	C10H16	0.795413	0.81587	0.0472557	0.0485456	0.0286743	0.570754	0	0
trans-beta-Ocimene	136	Monoterpene	C10H16	0	0	0	0	0	0	0	0
cis-beta-Ocimene	136	Monoterpene	C10H16	0.00227688	0.00343776	0.00191168	0	0	0	0	0.00157164
Salicylaldehyde	122	Phenolic	C7H6O2	0	0	0.120828	0	0	0	0	0.0464193
Indene	116	PAH	C9H8	0.0076415	0.00743025	0.0218429	0.0133956	0	0.00866315	0.00364862	0.0258599
gamma-Terpinene	136	Monoterpene	C10H16	0.0197845	0.0462565	0.0217676	0.0267717	0.0247589	0.00965249	0.00300186	0.0128478
Acetophenone	120	Ketone	C8H8O	0.0241296	0.0284356	0.0325763	0.020087	0.0915993	0.0165254	0.0392263	0.0269186
Terpinolene	136	Monoterpene	C10H16	0.038652	0.0900043	0.0215472	0.01556	0.00542477	0.0142982	0	0.0307275
Guaiacol	124	Phenolic	C7H8O2
Phenol, 2,6-dimethyl-	122	Phenolic	C8H10O	0	0	0	0	0	0	0	0
Benzaldehyde	106	Aldehyde	C7H6O	0	0	0	0	0	0	0	0
Phenol, 2,5-dimethyl-	122	Phenolic	C8H10O	0	0	0	0	0	0	0
Phenol, 2,4-dimethyl-	122	Phenolic	C8H10O	0	0	0	0	0	0	0	0
Camphor	152	Oxygnated Terpene	C10H16O	0.0300169	0.0320704	0.0181711	0.0225095	0.0176452	0	0	0.00707106
Phenol, 3,5-dimethyl-	122	Phenolic	C8H10O	0	0	0	0	0	0	0	0
Phenol, 2,3-dimethyl-	122	Phenolic	C8H10O	0	0	0	0	0	0	0	0
1-Dodecene	168	Alkene	C12H24	0.00892211	0.00816551	0.0276645	0.0216322	0.00868454	0.00898841	0.0170472	0.0161066
Creosol	138	Phenolic	C8H10O2	0.622956	0.508075	0.467636	0.597641	0	0	0.345132	0.605625
Naphthalene	128	PAH	C10H8	0.0334556	0.0317156	0.112007	0.134289	0.123025	0.0452017	0.099636	0.0885055
Phenol, 2,4,6-trimethyl-	136	Phenolic	C9H12O	0	0	0	0	0	0	0	0
Guaiacol, 4-ethyl	152	Phenolic	C9H12O2	0.0671839	0	0.0894586	0	0	0	0	0.0962293
Bornyl acetate	196	Oxygnated Terpene	C12H12O2	0.0128615	0.0162259	0.00486112	0.00660337	0.0087176	0	0.00319117	0.000850005
Indole	117	Heterocyclic	C8H7N	0	0	0	0	0	0	0	0
Naphthalene, 2-methyl-	142	PAH	C11H10	0.00802311	0.00397784	0.0181089	0.0232892	0.0297759	0.0111309	0.0190279	0.0216129
Naphthalene, 1-methyl-	142	PAH	C11H10	0.00522665	0.00445053	0.0106614	0.01461	0.0109752	0	0.0126993	0.0149556
Eugenol	164	Oxygnated Terpene	C10H12O2	0	0	0	0	0	0	0	0.0491127
1,13-Tetradecadiene	194	Alkene	C14H26	0	0	0	0	0	0	0	0.000409491
1-Tetradecene	196	Alkene	C14H28	0.00220031	0.00344043	0.00523436	0.00469429	8.79416e-05	0.00384025	0.00350258	0.00342951
Naphthalene, 2-ethyl-	156	PAH	C12H12	0.00046712	0	0.0013703	0	0	0	0	0.00227451
Longifolene	204	Sesquiterpene	C15H24	0.00376543	0.00406045	0.152246	0.155058	0.182728	0	0.00963737	0.0192048
Naphthalene, 1-ethyl-	156	PAH	C12H12	0.000261322	0	0	0	0	0	0	0.000470604
Naphthalene, 2,6-dimethyl-	156	PAH	C12H12	0.000660559	0	0.00115269	0	0	0	0	0.00237684
iso-Eugenol	164	Oxygnated Terpene	C10H12O2	0	0	0	0	0	0	0	0
Acenaphthylene	152	PAH	C12H8	0.00025525	0	0.000832676	0	0	0	0	0.0060101
Acenaphthene	154	PAH	C12H10	0	0	0	0	0	0	0	0.000880313
