# Supplementary material for: Emissions of Organic Compounds from Western US Wildfires and Their Near Fire Transformations
Source: Copernicus journal article supplement (doi:10.5194/acp-2022-297), 2022-04-25
Supplement: Supplementary file 1 [file acp-2022-297-supplement.zip › SI FIREXAQ v5.pdf]

## *Supplement of*

# **Emissions of Organic Compounds from Western US Wildfires and their Near Fire Transformations**

5 **Yutong Liang et al.**

*Correspondence to:* Yutong Liang (yutong.liang@berkeley.edu)

10 **This Supplement contains:**

1. Improved calibration and quantification method for particle phase compounds – Page S2
2. Estimation of saturation vapor pressure of particle phase compounds – Page S2-S3
3. Calculation of adjusted EF – Page S3
4. Supplementary figures and tables – Page S4-S15

15 5. Supplementary references Page S16-S17

## 1. Improved calibration and quantification method for particle phase compounds

In our previous work, most compounds were quantified by normalizing them to their nearest internal standard in the GC×GC space, and then applying the calibration curve of those compounds themselves or surrogate external standards. We manually  
20 picked external standards to quantify analyte compounds of interest. The assignment of both external standard and internal standard are improved in this work. First, we calculated two parameters, i.e., 2D distance on the GC×GC space and spectral cosine similarity to aid our decision on which (surrogate) external standard should we use for quantifying the compound of interest. The cosine similarity (CS) is calculated by:

$$CS = \frac{\overrightarrow{MS_1} \cdot \overrightarrow{MS_2}}{|\overrightarrow{MS_1}| |\overrightarrow{MS_2}|} \quad (S1)$$

25 where  $\overrightarrow{MS_1}$  and  $\overrightarrow{MS_2}$  are the mass spectra vector of the compound being quantified, and the mass spectra vector of the standard, respectively (Isaacman-VanWertz et al., 2020; Stein, 1994). Two identical mass spectral will have a CS = 1, while two orthogonal mass spectra will have a CS = 0.

Some internal standards co-elute with other compounds in the chromatogram. Cutting such co-eluting blobs can cause large  
30 uncertainties for quantification. Also, the purposes of internal standards are to correct for the drift of system response, and loss of analytes during sample preparation and derivatization. We strive to use an internal standard compound similar to the compound being calibrated to achieve the highest accuracy. Therefore, in this work, we compared the R<sup>2</sup> of the calibration curves of standard compounds based on normalization to the nearest internal standard, and the R<sup>2</sup> based on normalization to the nearest deuterated alkane standard. The internal standard producing the higher R<sup>2</sup> was chosen. This method improved the  
35 average R<sup>2</sup> of standard calibration curves by 0.11.

## 2. Estimation of saturation vapor pressures of particle phase compounds

In our previous work, we estimated the solid state saturation vapor pressure of compounds (Liang et al., 2021). However, there is evidence that organic compounds in the complex mixture have liquid-like properties (Koponen et al., 2007; Riipinen et al., 2007). Also, partitioning models and the volatility basis set (VBS) model use the subcooled liquid vapor pressure as inputs  
40 (Booth et al., 2010; Donahue et al., 2011). Therefore, in this work, we estimated the subcooled liquid pressures of compounds instead. The subcooled liquid vapor pressures of compounds were estimated by three methods. First, for compounds identified with formula and structure ( $n = 148$ ), we used the SIMPOL model (Pankow and Asher, 2008) via the GECKO-A platform (<http://geckoa.lisa.u-pec.fr>), the PEACH package (Isaacman-Vanwertz and Aumont, 2021) and/or manual calculation to get  
45 their subcooled liquid vapor pressures at 298 K. We noticed that the SIMPOL model may substantially overestimate the vapor pressure of nitro-aromatic compounds than experimental data and predictions from other models. For instance, the saturation vapor pressure of 4-nitrophenol is predicted to be 32 Pa at 298K, while the experimental data and the predictions from other

models give pressures on the order of  $10^{-3}$  Pa (Bannan et al., 2017; Wania et al., 2017). Therefore, we used the MPBPWIN component (modified Grain method) in EPA's EPI Suite (US EPA, 2012) to estimate the subcooled saturation vapor pressures of these nitro-aromatic compounds. For compounds with confirmed formula but unconfirmed structure ( $n = 28$ ), we estimated the saturation vapor pressures using the method by Li et al. (2016), also via the PEACH package. For the rest 64 compounds without confirmed formulae, similar to our previous work, we trained a regression model (with 5-fold cross validation) using the MATLAB (version 2021b) Regression Learner to predict their saturation vapor pressure  $v_p$ . Compound class, first column retention index, and second column retention time were used as the inputs, and  $\log_{10}(v_p)$  was the output. The training dataset includes all the standard compounds (with their vapor pressures calculated by SIMPOL). The root-mean-square error (RMSE) and  $R^2$  of the model are 0.93 and 0.86, respectively.

### 3. Calculation of adjusted EF

While laboratory burns offer some advantages over field burns, conditions may be sufficiently different to warrant adjustments of laboratory-derived emission factors (EFs) to better represent field fires. Specifically, in laboratory experiments modified combustion efficiency (MCE) is typically higher than in wildfires. Previous studies have described and applied methods for adjusting laboratory-derived EFs (e.g., Christian et al. (2003), Yokelson et al. (2008), Selimovic et al. (2018)). Most commonly, laboratory EFs for individual compounds or classes of compounds are plotted as a function of MCE and the data are fit using linear regression; the slope and intercept of the linear fit allows calculation of a field-adjusted EF based on the field-derived MCE. This method requires having enough data points for each compound/class of compounds to obtain a robust linear regression. As shown in Stockwell et al. (2015) and Permar et al. (2021), the slope and intercept are dependent on the compound/compound class and thus global fits are not appropriate. Here, a modified approach was applied in which the EF ratio of the compound of interest to CO was averaged between FIREX laboratory and field measurements:

$$EF_{adjusted} = \frac{1}{2} \left( \frac{EF_{i,lab}}{EF_{CO,lab}} + \frac{EF_{i,field}}{EF_{CO,field}} \right) \times EF_{CO,field} \quad (S1)$$

where  $EF_{adjusted}$  is the adjusted emission factor,  $EF_i$  is the emission of compound  $i$ . Averaging the laboratory and field  $EF_{compound}/EF_{CO}$  accounts for the combustion-type-specific information from both laboratory and field studies, while multiplying by  $EF_{CO,field}$  removes bias from the higher overall MCE (higher flaming/smoldering ratio) in the laboratory studies than in the field. In this work, the field EFs were calculated by averaging across the Arizona and Nethker samples.

4. Supplementary figures and tables

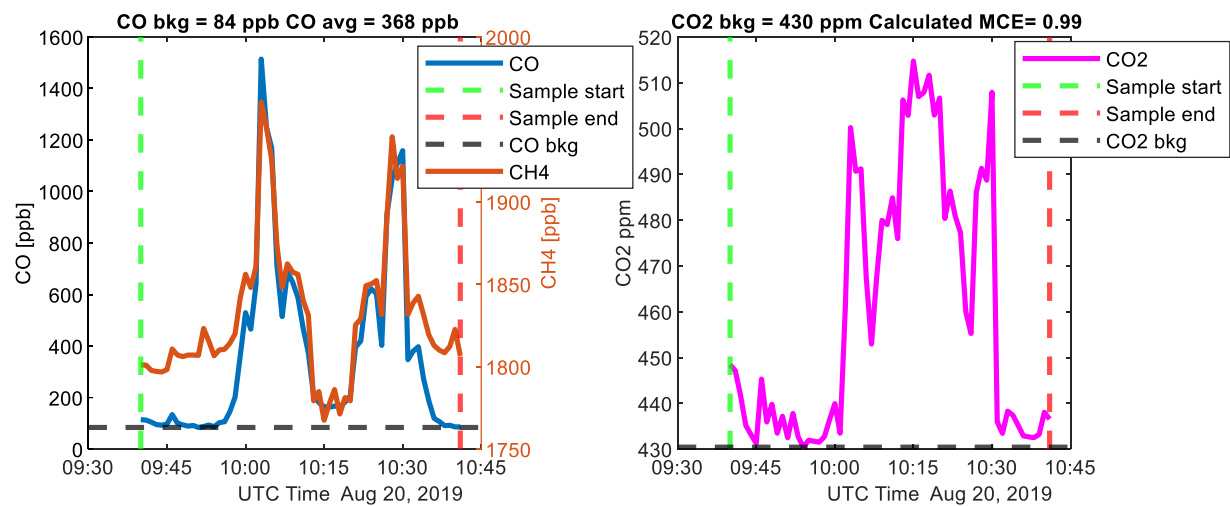

75 **Figure S1:** Example of an hourly sample affected by CO<sub>2</sub> unknown source. The CO<sub>2</sub> peak around 10:15 was from unknown source because CO or CH<sub>4</sub> were not elevated simultaneously with CO<sub>2</sub>. It caused a very high hourly integrated “MCE” that cannot represent the combustion efficiency of the two major plumes at 10:03 and 10:30.

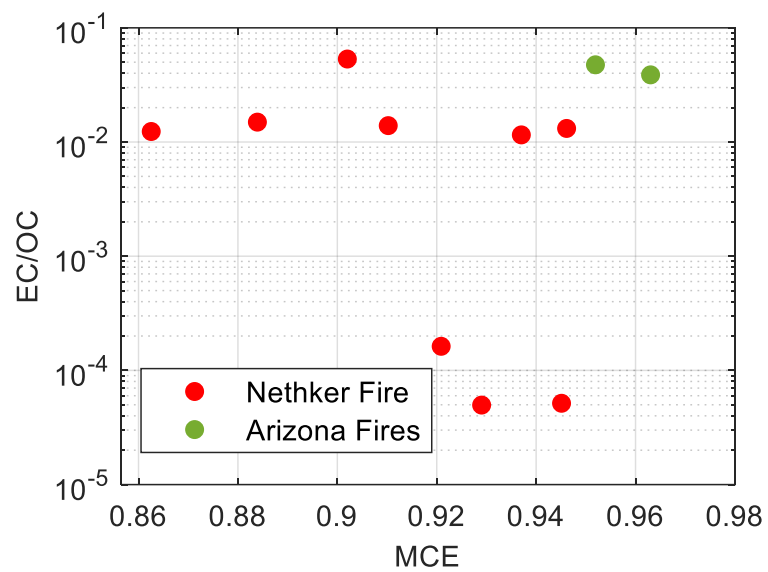

80

**Figure S2:** EC/OC ratio vs MCE. No clear trend is observed.

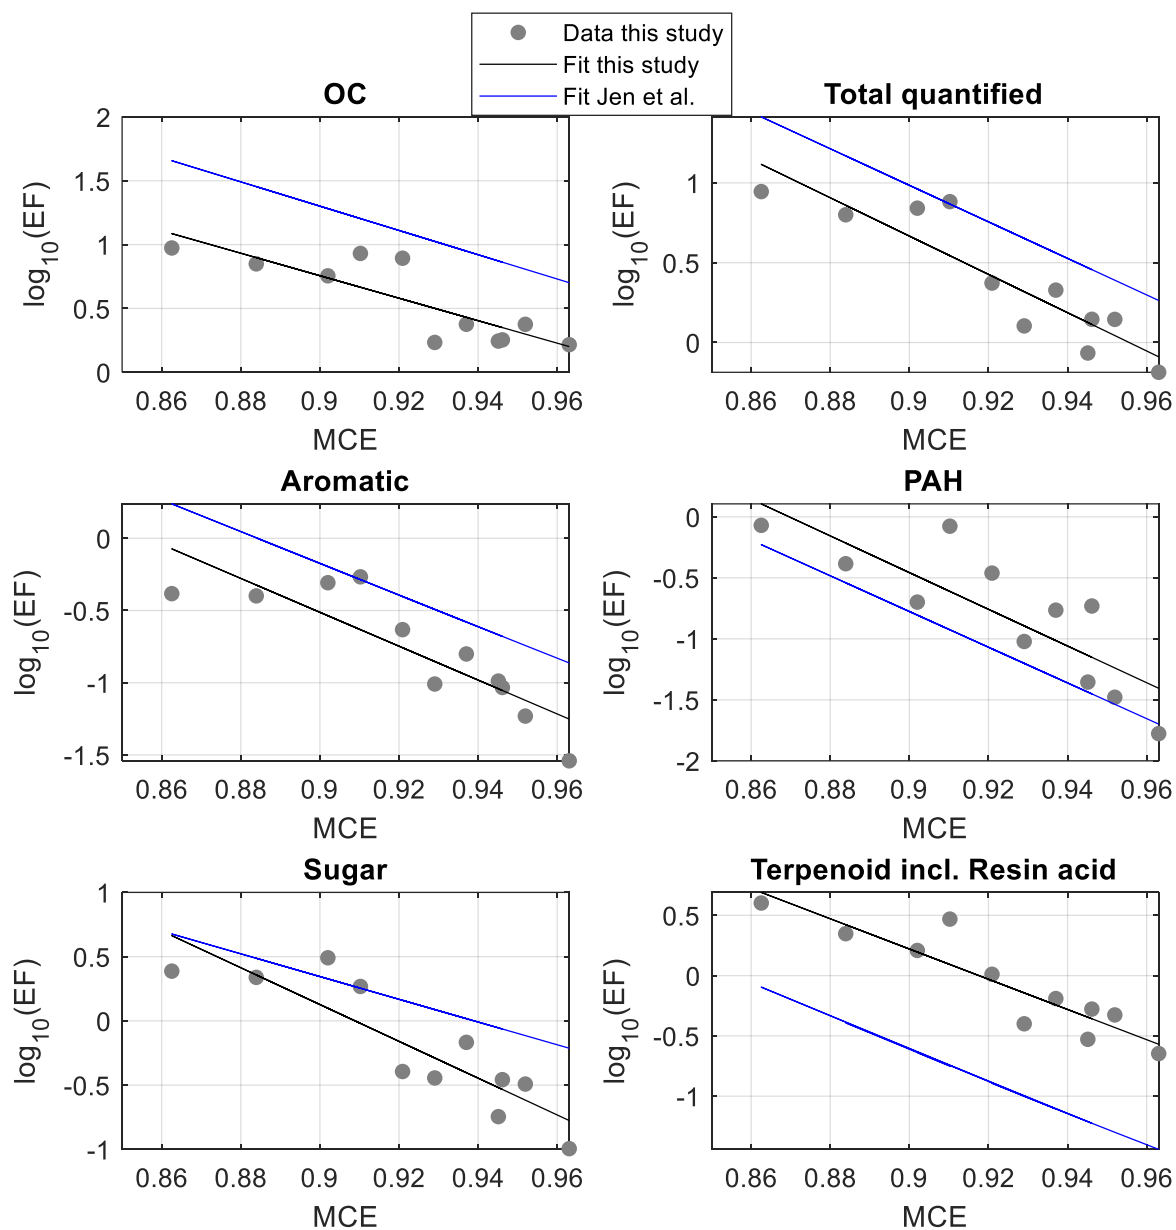

**Figure S3:** Comparison of emission factors of OC and average summed emission factors of compounds in this study and in Jen et al. (2019).

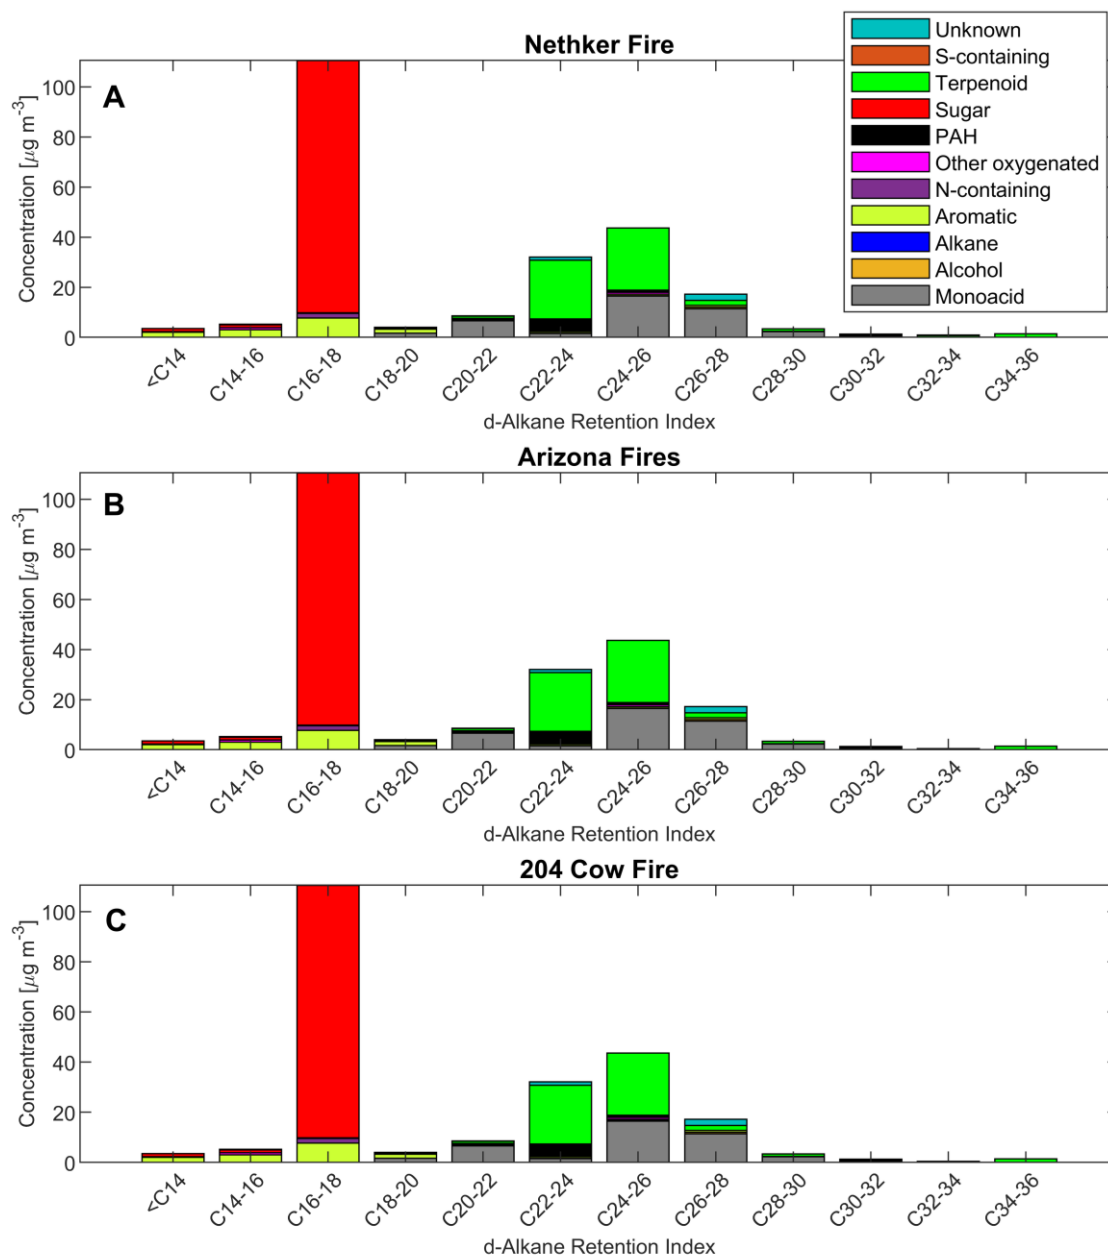

**Figure S4:** Mass distribution of speciated compounds in different retention index bins. Retention index is linearly related to retention time. (A) is for the most heavily loaded sample collected near the Nethker Fire ( $\text{OC} = 352 \mu\text{g m}^{-3}$ ); (B) is for the most heavily loaded sample collected near the Arizona Ikes and Castle Fires ( $\text{OC} = 138 \mu\text{g m}^{-3}$ ); (C) is for the most heavily loaded sample collected near the 204 Cow Fire ( $\text{OC} = 260 \mu\text{g m}^{-3}$ ).  $N = 1$  in each plot.

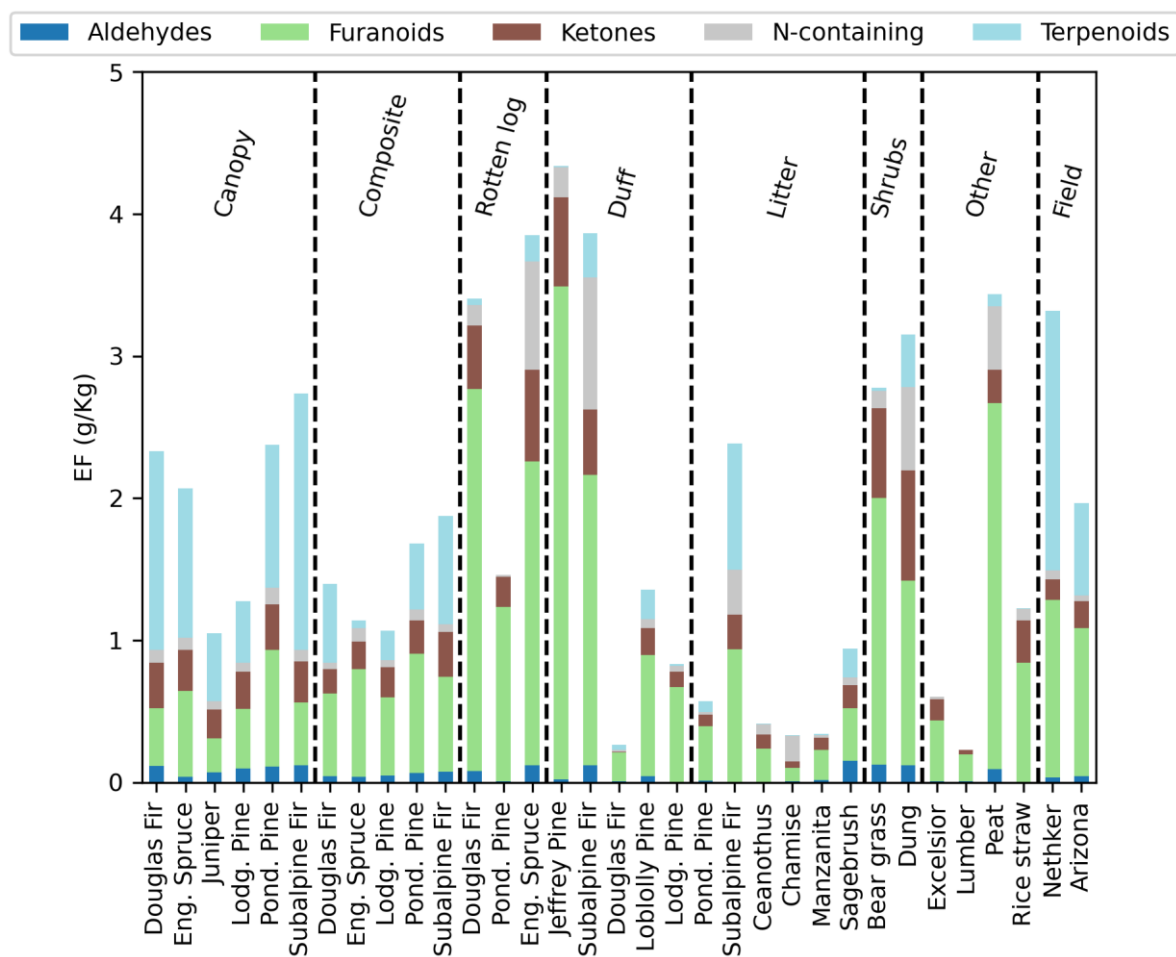

100 **Figure S5:** Average summed emission factors of 5 groups of VOCs (terpenoid, ketones, aldehydes, N-containing and furanoids) from this study and from burning each fuel in the Fire Lab 2016 study.

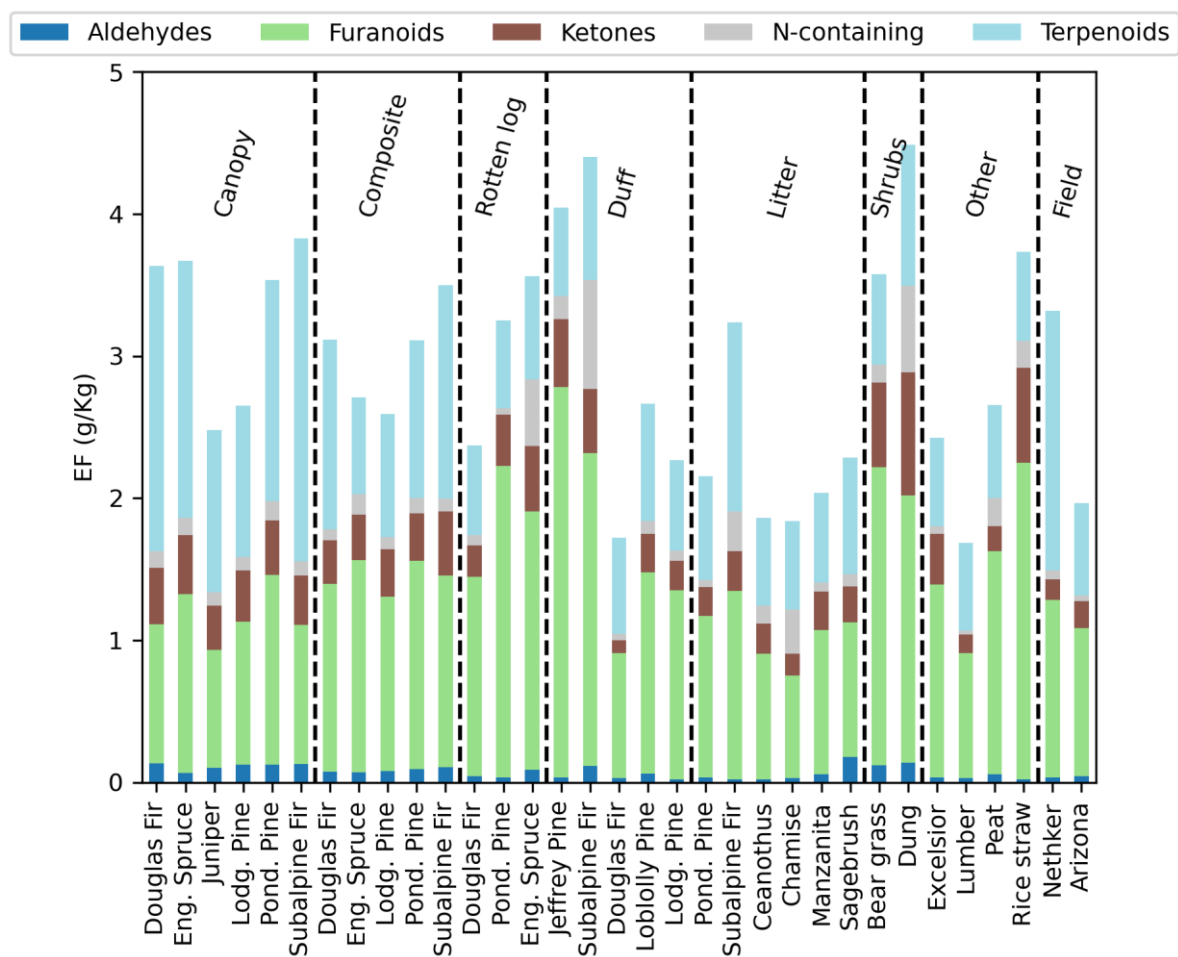

105 **Figure S6:** Average summed **adjusted** emission factors of 5 groups of VOCs (terpenoid, ketones, aldehydes, N-containing and furanoids) from this study and from burning each fuel in the Fire Lab 2016 study.

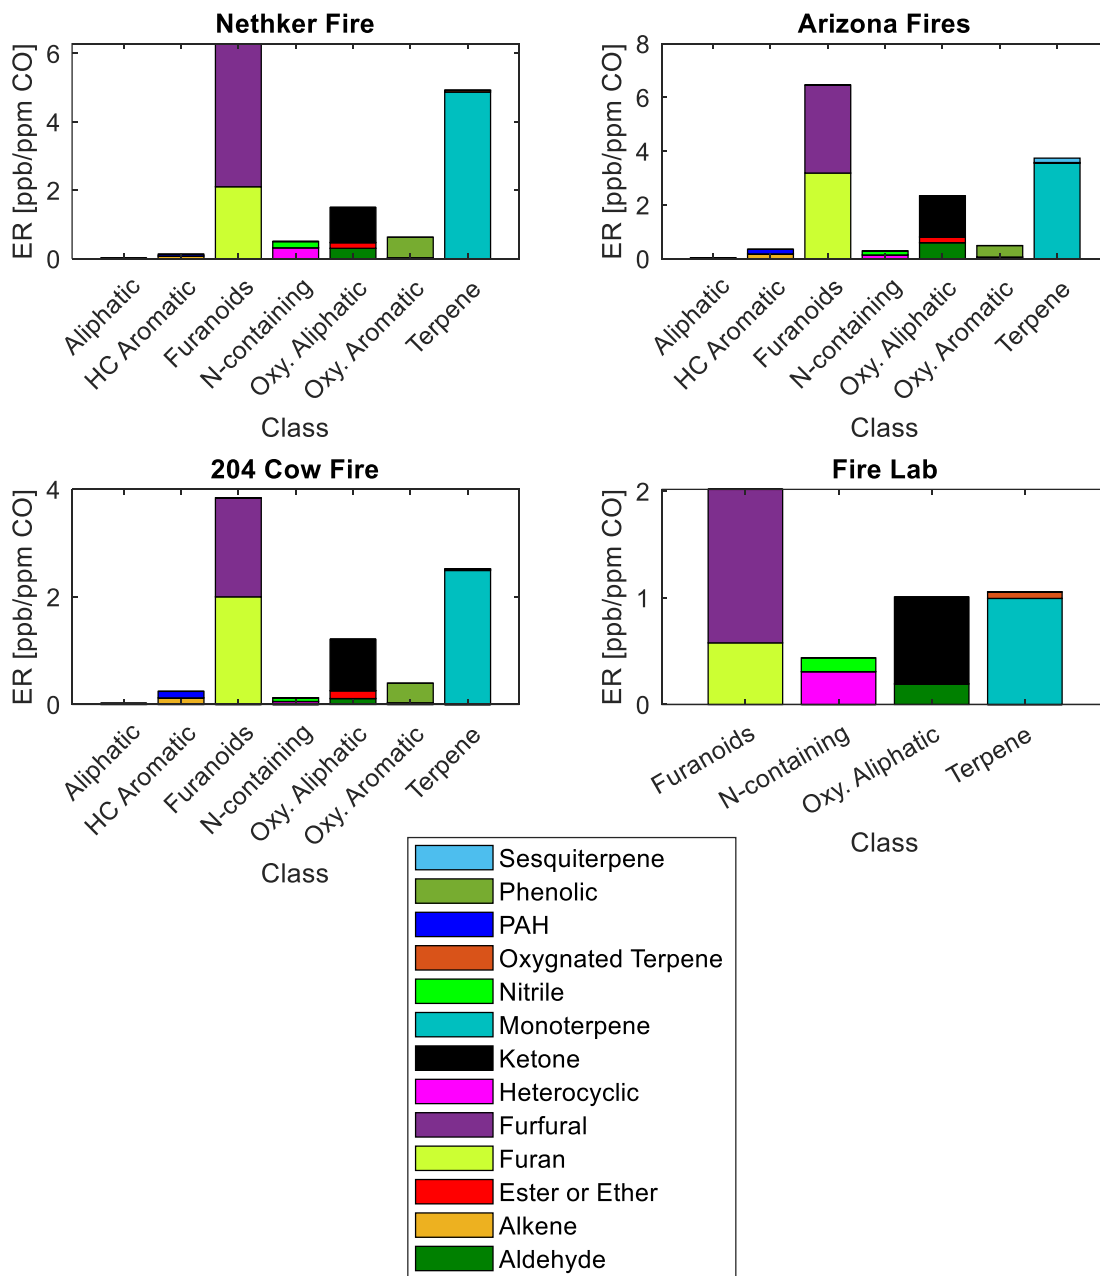

**Figure S7:** Average emission ratios of observed VOCs in Nethker Fire (N = 2), Arizona Fires (N = 3), and 204 Cow Fire (N = 3), grouped by chemical classification. Results from the Fire Lab study are the average of all fuels. Only furanoids, nitrogen-containing compounds, oxygenated aliphatic compounds and terpenes were quantified in the Fire Lab study.

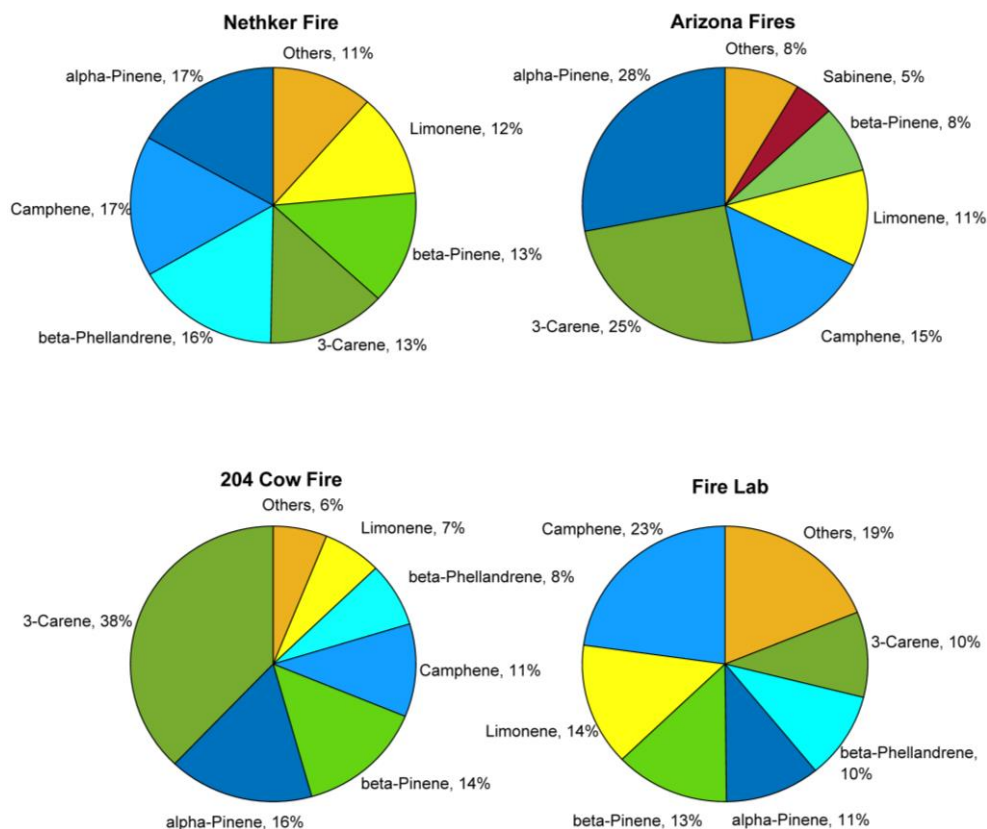

115 **Figure S8:** The fraction of gas phase terpenoids emission ratio (with respect to CO) attributed to the top 6 observed terpenoids and other tepenoids.

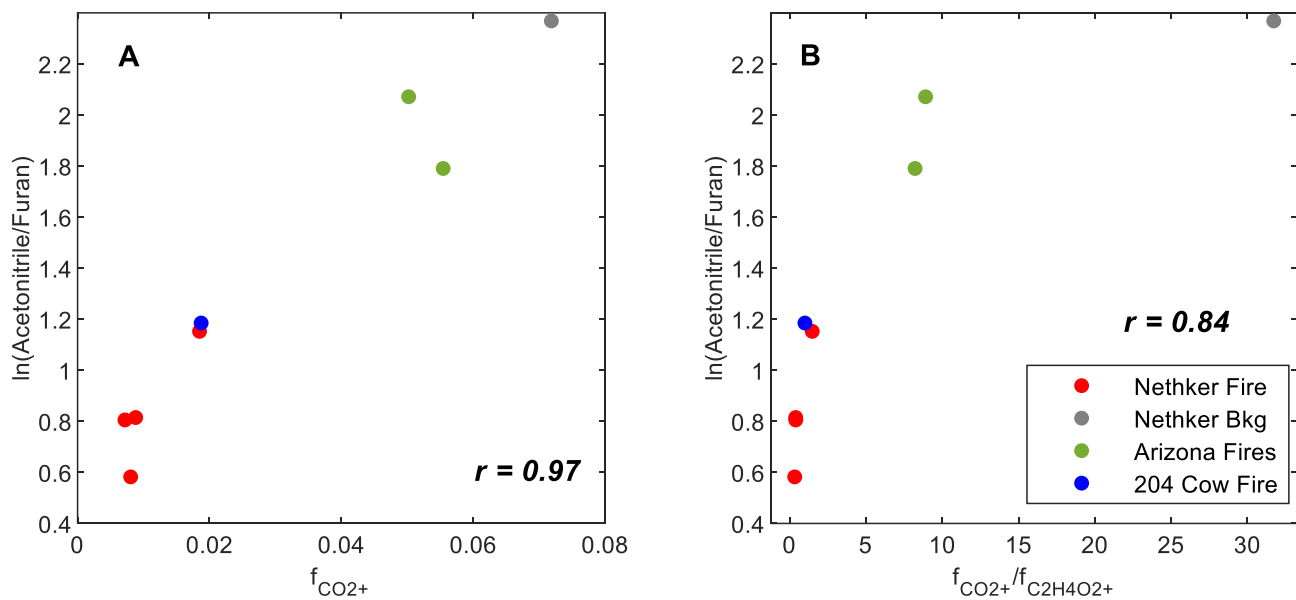

120 **Figure S9:** The  $\ln(\text{Acetonitrile/Furan})$  ratio vs **A.**  $f_{\text{CO}_2+}$  and **B.**  $f_{\text{CO}_2+}/f_{\text{C}_2\text{H}_4\text{O}_2+}$  from SP-AMS. They have strong positive correlations.

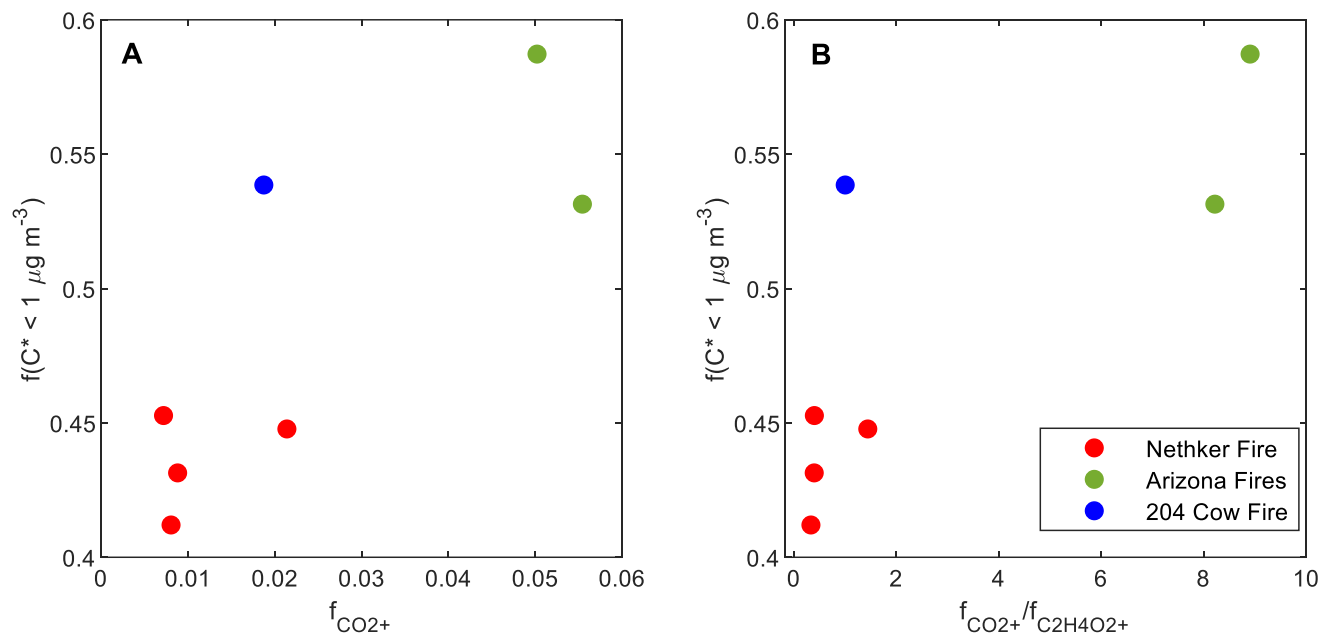

125 **Figure S10:** Mass fraction of summed concentration of observed particle phase compounds with  $C^* < 1 \mu\text{g m}^{-3}$  in total quantified OA, as a function of **A.**  $f_{\text{CO}_2+}$  and **B.**  $f_{\text{CO}_2+}/f_{\text{C}_2\text{H}_4\text{O}_2+}$ .

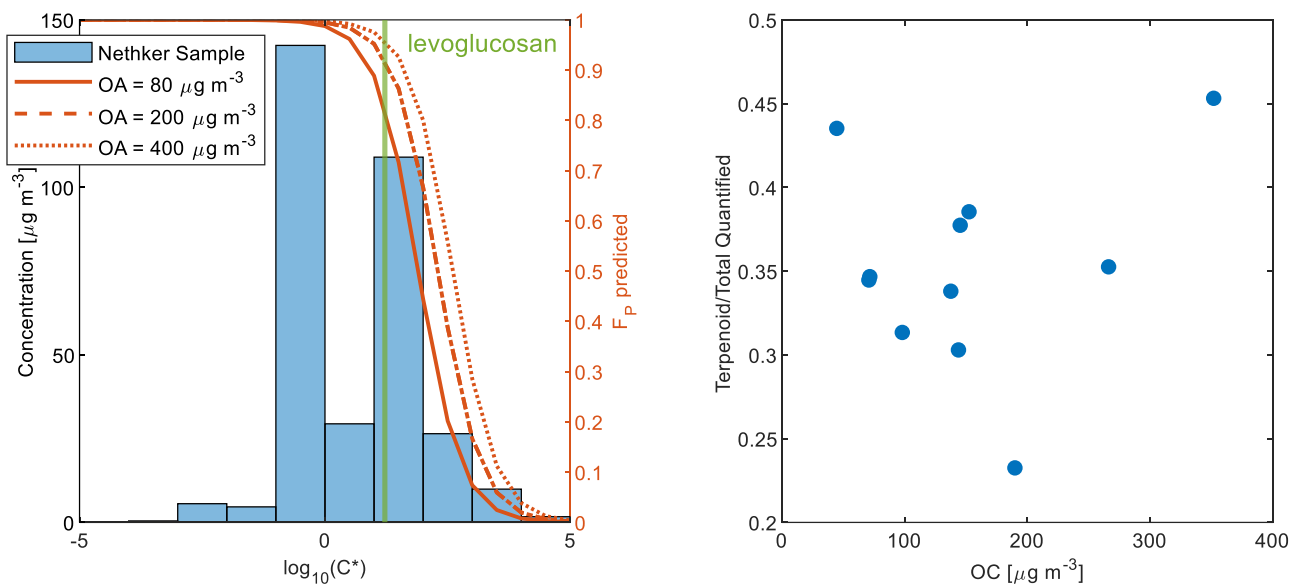

**Figure S11:** Left: Mass distribution of speciated compounds in different effective saturation concentration bins for the most heavily loaded sample collected near the Nethker Fire, and the predicted particle phase fraction ( $F_p$ ) as a function of effective saturation concentration. Vertical line shows the  $\log_{10}(C^*)$  of levoglucosan, the dominant compound in that bin. Right: Mass fraction of terpeneoids (including resin acids) in total quantified OA vs. OC.

**Table S1** Standards for calibration, their linear retention indices based on *n*-alkanes and their secondary retention time.

| Compound                        | LRI <i>n</i> -alkane | RT2 (s) | Compound                           | LRI <i>n</i> -alkane | RT2 (s) |
|---------------------------------|----------------------|---------|------------------------------------|----------------------|---------|
| (-)-verbenone                   | 1198                 | 1.86    | C32 alkane                         | 3200                 | 0.53    |
| (+)-borneol                     | 1216                 | 0.53    | C33 alkane                         | 3300                 | 0.55    |
| 1,2-acenaphthylenedione         | 1876                 | 2.16    | C34 alkane                         | 3400                 | 0.56    |
| 1,2-benzanthracene              | 2472                 | 1.15    | C35 alkane                         | 3500                 | 0.60    |
| 16-hydroxyhexadecanoic acid     | 2385                 | 0.61    | C36 alkane                         | 3600                 | 0.64    |
| 2,4-dinitrophenol               | 1752                 | 2.24    | C6 diacid                          | 1502                 | 0.90    |
| 2-ketoglutaric acid             | 1603                 | 0.70    | C8 acid                            | 1257                 | 0.67    |
| 2-methylthreitol                | 1530                 | 0.48    | C9 acid                            | 1357                 | 0.64    |
| 2-pentadecanone                 | 1698                 | 0.83    | catechol                           | 1309                 | 0.62    |
| 3,3-dimethylglutaric acid       | 1505                 | 0.81    | cholestane                         | 2865                 | 0.72    |
| 3,5-dimethoxyphenol             | 1501                 | 0.79    | cholesterol                        | 3150                 | 0.72    |
| 3-decanol                       | 1284                 | 0.44    | chrysene                           | 2483                 | 1.15    |
| 3-guaiacylpropanol              | 1525                 | 0.59    | coniferyl aldehyde                 | 1840                 | 1.36    |
| 3-hydroxy-3-methylglutaric acid | 1597                 | 0.72    | D-(+)-mannose                      | 1792                 | 0.52    |
| 3-methyl-5-nitrocatechol        | 1830                 | 1.35    | dehydroabietic acid                | 2387                 | 0.71    |
| 3-octadecanone                  | 1996                 | 0.73    | dibenz(a,h)anthracene              | 3217                 | 1.32    |
| 4,4-dimethoxy-benzophenone      | 2251                 | 1.29    | dibenzofuran                       | 1525                 | 0.86    |
| 4-hydroxybenzoic acid           | 1624                 | 0.81    | dodecanedioic acid                 | 2083                 | 0.79    |
| 4-methyl-5-nitrocatechol        | 1773                 | 1.26    | eicosanol                          | 2347                 | 0.47    |
| 4-methylcatechol                | 1383                 | 0.58    | ergosterol                         | 3235                 | 0.70    |
| 4-nitrocatechol                 | 1740                 | 1.41    | erythritol                         | 1505                 | 0.48    |
| 5-(hydroxymethyl)furfural       | 1309                 | 1.25    | fluoranthene                       | 2077                 | 1.09    |
| 5-nitrovanillin                 | 1836                 | 1.91    | fluorene                           | 1592                 | 0.88    |
| 9H-fluoren-9-one                | 1746                 | 1.24    | gamma-dodecalactone                | 1679                 | 1.72    |
| abietic acid                    | 2423                 | 0.72    | glucose                            | 1900                 | 0.55    |
| acetosyringone                  | 1761                 | 1.16    | glyceric acid                      | 1324                 | 0.60    |
| acetovanillone                  | 1615                 | 1.16    | Hexadecane, 2,6,10,14-tetramethyl- | 1806                 | 0.46    |
| alpha amyirin                   | 3413                 | 0.90    | hexadecanol                        | 1956                 | 0.46    |
| anthracene                      | 1804                 | 0.98    | hydroquinone                       | 1397                 | 0.67    |
| anthraquinone                   | 1981                 | 1.31    | indeno(1,2,3-cd)pyrene             | 3205                 | 1.40    |
| azelaic acid                    | 1791                 | 0.84    | isoeugenol                         | 1565                 | 0.68    |
| benzo(a)pyrene                  | 2885                 | 1.28    | isopimaric acid                    | 2341                 | 0.75    |
| benzo(b)fluoranthene            | 2793                 | 1.25    | levoglucosan                       | 1699                 | 0.76    |
| benzo(g,h,i)perylene            | 3276                 | 1.39    | linoleic acid                      | 2206                 | 0.59    |
| benzo(k)fluoranthene            | 2801                 | 1.25    | malic acid                         | 1485                 | 0.76    |
| benzoic acid                    | 1241                 | 0.78    | maltol                             | 1279                 | 1.04    |

|                                               |      |      |                                                       |      |      |
|-----------------------------------------------|------|------|-------------------------------------------------------|------|------|
| <b>benzophenone</b>                           | 1634 | 1.06 | <b>3-methyl-1,2,3-butane-1,2,3-tricarboxylic acid</b> | 1746 | 0.86 |
| <b>beta-sitosterol</b>                        | 3343 | 0.73 | <b>monopalmitin</b>                                   | 2581 | 0.62 |
| <b>bornyl acetate</b>                         | 1282 | 0.94 | <b>octadecanal</b>                                    | 2021 | 0.73 |
| <b>C10 acid</b>                               | 1455 | 0.63 | <b>octadecanol</b>                                    | 2152 | 0.45 |
| <b>C11 acid</b>                               | 1552 | 0.61 | <b>oleic acid</b>                                     | 2212 | 0.59 |
| <b>C12 acid</b>                               | 1651 | 0.62 | <b>palmitoleic acid</b>                               | 2021 | 0.59 |
| <b>C13 acid</b>                               | 1746 | 0.60 | <b>p-anisic acid</b>                                  | 1519 | 0.88 |
| <b>C14 acid</b>                               | 1846 | 0.60 | <b>pentadecane, 2,6,10,14-tetramethyl-</b>            | 1705 | 0.45 |
| <b>C15 alkane (normal alkane, same below)</b> | 1500 | 0.43 | <b>phenanthrene</b>                                   | 1792 | 0.98 |
| <b>C15 acid</b>                               | 1944 | 0.61 | <b>phthalamide</b>                                    | 1566 | 1.04 |
| <b>C16 alkane</b>                             | 1600 | 0.41 | <b>phthalic acid</b>                                  | 1686 | 1.01 |
| <b>C16 acid</b>                               | 2043 | 0.61 | <b>pinic acid</b>                                     | 1663 | 0.87 |
| <b>C17 alkane</b>                             | 1700 | 0.41 | <b>pinic acid isomer</b>                              | 1670 | 0.87 |
| <b>C17 acid</b>                               | 2139 | 0.59 | <b>pinonic acid</b>                                   | 1524 | 1.33 |
| <b>C18 alkane</b>                             | 1800 | 0.43 | <b>protocatechuic acid</b>                            | 1814 | 0.71 |
| <b>C18 acid</b>                               | 2240 | 0.60 | <b>pyrogallol</b>                                     | 1535 | 0.53 |
| <b>C19 alkane</b>                             | 1900 | 0.45 | <b>pyrogallol isomer</b>                              | 1595 | 0.59 |
| <b>C20 alkane</b>                             | 2000 | 0.46 | <b>quinoline</b>                                      | 1239 | 0.98 |
| <b>C20 acid</b>                               | 2437 | 0.59 | <b>resorcinol</b>                                     | 1377 | 0.66 |
| <b>C21 alkane</b>                             | 2100 | 0.45 | <b>retene</b>                                         | 2225 | 0.93 |
| <b>C22 alkane</b>                             | 2200 | 0.45 | <b>sinapaldehyde</b>                                  | 2001 | 1.41 |
| <b>C22 acid</b>                               | 2635 | 0.61 | <b>stigmasterol</b>                                   | 3283 | 0.72 |
| <b>C23 alkane</b>                             | 2300 | 0.46 | <b>syringaldehyde</b>                                 | 1699 | 1.22 |
| <b>C23 acid</b>                               | 2734 | 0.60 | <b>syringic acid</b>                                  | 1892 | 0.77 |
| <b>C24 alkane</b>                             | 2400 | 0.47 | <b>syringol</b>                                       | 1396 | 0.74 |
| <b>C24 acid</b>                               | 2834 | 0.60 | <b>terpinen-4-ol</b>                                  | 1166 | 0.68 |
| <b>C25 alkane</b>                             | 2500 | 0.47 | <b>tetradecane-1,14-dioic acid</b>                    | 2277 | 0.76 |
| <b>C26 alkane</b>                             | 2600 | 0.49 | <b>threitol</b>                                       | 1497 | 0.47 |
| <b>C26 acid</b>                               | 3031 | 0.61 | <b>tricarballic acid</b>                              | 1727 | 0.90 |
| <b>C27 alkane</b>                             | 2700 | 0.51 | <b>tridecanal</b>                                     | 1512 | 0.81 |
| <b>C28 alkane</b>                             | 2800 | 0.50 | <b>tyrosol</b>                                        | 1566 | 0.57 |
| <b>C28 acid</b>                               | 3230 | 0.61 | <b>vaccenic acid</b>                                  | 2219 | 0.59 |
| <b>C29 alkane</b>                             | 2900 | 0.51 | <b>vanillic acid</b>                                  | 1757 | 0.78 |
| <b>C30 alkane</b>                             | 3000 | 0.52 | <b>vanillin</b>                                       | 1532 | 1.24 |
| <b>C31 alkane</b>                             | 3100 | 0.52 | <b>xanthone</b>                                       | 1872 | 1.23 |

## 5. Supplementary references

- Bannan, T. J., Booth, A. M., Jones, B. T., O'Meara, S., Barley, M. H., Riipinen, I., Percival, C. J. and Topping, D.: Measured Saturation Vapor Pressures of Phenolic and Nitro-aromatic Compounds, *Environ. Sci. Technol.*, 51(7), 3922–3928, doi:10.1021/acs.est.6b06364, 2017.
- 140 Booth, A. M., Barley, M. H., Topping, D. O., McFiggans, G., Garforth, A. and Percival, C. J.: Solid state and sub-cooled liquid vapour pressures of substituted dicarboxylic acids using Knudsen Effusion Mass Spectrometry (KEMS) and Differential Scanning Calorimetry, *Atmos. Chem. Phys.*, 10, 4879–4892, doi:10.5194/acp-10-4879-2010, 2010.
- Christian, T. J., Kleiss, B., Yokelson, R. J., Holzinger, R., Crutzen, P. J., Hao, W. M., Saharjo, B. H. and Ward, D. E.: Comprehensive laboratory measurements of biomass-burning emissions: 1. Emissions from Indonesian, African, and other
- 145 fuels, *J. Geophys. Res. Atmos.*, 108(23), 4719, doi:10.1029/2003jd003704, 2003.
- Donahue, N. M., Epstein, S. A., Pandis, S. N. and Robinson, A. L.: A two-dimensional volatility basis set: 1. organic-aerosol mixing thermodynamics, *Atmos. Chem. Phys.*, 11(7), 3303–3318, doi:10.5194/acp-11-3303-2011, 2011.
- Isaacman-Vanwertz, G. and Aumont, B.: Impact of organic molecular structure on the estimation of atmospherically relevant physicochemical parameters, *Atmos. Chem. Phys.*, 21, 6541–6563, doi:10.5194/acp-21-6541-2021, 2021.
- 150 Isaacman-VanWertz, G., Lu, X., Weiner, E., Smiley, E. and Widdowson, M.: Characterization of Hydrocarbon Groups in Complex Mixtures Using Gas Chromatography with Unit-Mass Resolution Electron Ionization Mass Spectrometry, *Anal. Chem.*, 92(18), 12481–12488, doi:10.1021/acs.analchem.0c02308, 2020.
- Jen, C. N., Hatch, L. E., Selimovic, V., Yokelson, R. J., Weber, R., Fernandez, A. E., Kreisberg, N. M., Barsanti, K. C. and Goldstein, A. H.: Speciated and total emission factors of particulate organics from burning western US wildland fuels and their
- 155 dependence on combustion efficiency, *Atmos. Chem. Phys.*, 19(2), 1013–1026, doi:10.5194/acp-19-1013-2019, 2019.
- Koponen, I. K., Riipinen, I., Hienola, A., Kulmala, M. and Bilde, M.: Thermodynamic properties of malonic, succinic, and glutaric acids: Evaporation rates and saturation vapor pressures, *Environ. Sci. Technol.*, 41(11), 3926–3933, doi:10.1021/es0611240, 2007.
- Li, Y., Pöschl, U. and Shiraiwa, M.: Molecular corridors and parameterizations of volatility in the chemical evolution of organic aerosols, *Atmos. Chem. Phys.*, 16(5), 3327–3344, doi:10.5194/acp-16-3327-2016, 2016.
- 160 Liang, Y., Jen, C. N., Weber, R. J., Miszta, P. K. and Goldstein, A. H.: Chemical composition of PM<sub>2.5</sub> in October 2017 Northern California wildfire plumes, *Atmos. Chem. Phys.*, 21(7), 5719–5737, doi:10.5194/acp-21-5719-2021, 2021.
- Pankow, J. F. and Asher, W. E.: SIMPOL.1: A simple group contribution method for predicting vapor pressures and enthalpies of vaporization of multifunctional organic compounds, *Atmos. Chem. Phys.*, 8(10), 2773–2796, doi:10.5194/acp-8-2773-2008,
- 165 2008.
- Permar, W., Wang, Q., Selimovic, V., Wielgasz, C., Yokelson, R. J., Hornbrook, R. S., Hills, A. J., Apel, E. C., Ku, I. T., Zhou, Y., Sive, B. C., Sullivan, A. P., Collett, J. L., Campos, T. L., Palm, B. B., Peng, Q., Thornton, J. A., Garofalo, L. A., Farmer, D. K., Kreidenweis, S. M., Levin, E. J. T., DeMott, P. J., Flocke, F., Fischer, E. V. and Hu, L.: Emissions of Trace

Organic Gases From Western U.S. Wildfires Based on WE-CAN Aircraft Measurements, *J. Geophys. Res. Atmos.*, 126(11),  
 170 doi:10.1029/2020JD033838, 2021.

Riipinen, I., Koponen, I. K., Frank, G. P., Hyvärinen, A. P., Vanhanen, J., Lihavainen, H., Lehtinen, K. E. J., Bilde, M. and  
 Kulmala, M.: Adipic and malonic acid aqueous solutions: Surface tensions and saturation vapor pressures, *J. Phys. Chem. A*,  
 111(50), 12995–13002, doi:10.1021/jp073731v, 2007.

Selimovic, V., Yokelson, R. J., Warneke, C., Roberts, J. M., De Gouw, J., Reardon, J. and Griffith, D. W. T.: Aerosol optical  
 175 properties and trace gas emissions by PAX and OP-FTIR for laboratory-simulated western US wildfires during FIREX, *Atmos.*  
*Chem. Phys.*, 18(4), 2929–2948, doi:10.5194/acp-18-2929-2018, 2018.

Stein, S. E.: Estimating probabilities of correct identification from results of mass spectral library searches, *J. Am. Soc. Mass*  
*Spectrom.*, 5(4), 316–323, doi:10.1016/1044-0305(94)85022-4, 1994.

Stockwell, C. E., Veres, P. R., Williams, J. and Yokelson, R. J.: Characterization of biomass burning emissions from cooking  
 180 fires, peat, crop residue, and other fuels with high-resolution proton-transfer-reaction time-of-flight mass spectrometry, *Atmos.*  
*Chem. Phys.*, 15(2), 845–865, doi:10.5194/acp-15-845-2015, 2015.

US EPA: Estimation Programs Interface Suite™ for Microsoft® Windows, United States Environ. Prot. Agency, Washington,  
 DC, USA, 2012.

Wania, F., Awonaike, B. and Goss, K. U.: Comment on “measured Saturation Vapor Pressures of Phenolic and Nitro-Aromatic  
 185 Compounds,” *Environ. Sci. Technol.*, 51(13), 7742–7743, doi:10.1021/acs.est.7b02079, 2017.

Yokelson, R. J., Christian, T. J., Karl, T. G. and Guenther, A.: The tropical forest and fire emissions experiment: Laboratory  
 fire measurements and synthesis of campaign data, *Atmos. Chem. Phys.*, 8(16), 4497, doi:10.5194/acp-8-4497-2008, 2008.
